# Supplementary material for: Novel stable ytterbium acetylacetonate–quinaldinate complexes as single-molecule magnets and surprisingly efficient luminophores
Source: Royal Society of Chemistry journal article supplement (doi:10.1039/d3dt03253a), 2023-01-01
Supplement: d3dt03253a1.pdf [file d3dt03253a1.pdf]

# Supplementary Information

to

**Novel Stable Ytterbium Acetylacetonate-Quinaldinate Complexes as Single-Molecule  
Magnets and Surprisingly Efficient Luminophores**

by

Andrey V. Gavrikov<sup>a</sup>, Andrey B. Ilyukhin<sup>a</sup>, Ilya V. Taydakov<sup>b</sup>,  
Mikhail T. Metlin<sup>b,c</sup>, Nikolay P. Datskevich<sup>b</sup>,  
Mikhail E. Buzoverov<sup>a</sup>, Konstantin A. Babeshkin<sup>a</sup>, Nikolay N. Efimov<sup>a</sup>

**Table S1.** Crystal data and structure refinement for **1, 2, 2\_1**.

| Identification code                       | <b>1</b>                                           | <b>2</b>                                                         | <b>2_1</b>                                                          |
|-------------------------------------------|----------------------------------------------------|------------------------------------------------------------------|---------------------------------------------------------------------|
| Empirical formula                         | C <sub>20</sub> H <sub>20</sub> NO <sub>6</sub> Yb | C <sub>32</sub> H <sub>28</sub> N <sub>3</sub> O <sub>6</sub> Yb | C <sub>35</sub> H <sub>37</sub> N <sub>3</sub> O <sub>7.50</sub> Yb |
| Formula weight                            | 543.41                                             | 723.61                                                           | 792.71                                                              |
| Temperature, K                            | 100(2)                                             | 150(2)                                                           | 100(2)                                                              |
| Wavelength, Å                             | 0.71073                                            | 0.71073                                                          | 0.71073                                                             |
| Crystal system                            | Monoclinic                                         | Triclinic                                                        | Triclinic                                                           |
| Space group                               | P2 <sub>1</sub> /n                                 | P-1                                                              | P-1                                                                 |
| a, Å                                      | 9.3312(2)                                          | 10.1267(4)                                                       | 11.9925(4)                                                          |
| b, Å                                      | 11.6285(3)                                         | 12.5770(5)                                                       | 12.1587(4)                                                          |
| c, Å                                      | 18.2162(5)                                         | 12.5907(5)                                                       | 26.1155(8)                                                          |
| α, °                                      | 90                                                 | 83.2460(10)                                                      | 101.6180(10)                                                        |
| β, °                                      | 96.5070(10)                                        | 71.9510(10)                                                      | 92.0670(10)                                                         |
| γ, °                                      | 90                                                 | 67.4820(10)                                                      | 118.4930(10)                                                        |
| Volume, Å <sup>3</sup>                    | 1963.87(9)                                         | 1408.44(10)                                                      | 3239.33(18)                                                         |
| Z                                         | 4                                                  | 2                                                                | 4                                                                   |
| D (calc), Mg/m <sup>3</sup>               | 1.838                                              | 1.706                                                            | 1.625                                                               |
| μ, mm <sup>-1</sup>                       | 4.798                                              | 3.371                                                            | 2.942                                                               |
| F(000)                                    | 1060                                               | 718                                                              | 1592                                                                |
| Crystal size, mm                          | 0.28 x 0.20 x 0.18                                 | 0.28 x 0.22 x 0.20                                               | 0.20 x 0.12 x 0.04                                                  |
| θ range, °                                | 2.082, 36.130                                      | 2.274, 30.138                                                    | 2.057, 33.159                                                       |
| Index ranges                              | -14<=h<=14<br>-17<=k<=18<br>-28<=l<=28             | -13<=h<=14<br>-16<=k<=17<br>-17<=l<=17                           | -18<=h<=18<br>-18<=k<=18<br>-37<=l<=40                              |
| Reflections collected                     | 43043                                              | 30295                                                            | 97701                                                               |
| Independent reflections, R <sub>int</sub> | 8524, 0.0364                                       | 7753, 0.0561                                                     | 23599, 0.0284                                                       |
| Completeness to θ = 25.242°               | 99.9 %                                             | 99.9 %                                                           | 99.8 %                                                              |
| Absorption correction                     | Semi-empirical<br>from equivalents                 | Semi-empirical<br>from equivalents                               | Semi-empirical<br>from equivalents                                  |
| Max., min. transmission                   | 0.5675, 0.4024                                     | 0.746, 0.6579                                                    | 0.7465, 0.6129                                                      |
| Refinement method                         | Full-matrix<br>least-squares on F <sup>2</sup>     | Full-matrix<br>least-squares on F <sup>2</sup>                   | Full-matrix<br>least-squares on F <sup>2</sup>                      |
| Data / restraints / parameters            | 8524 / 0 / 253                                     | 7753 / 0 / 383                                                   | 23599 / 0 / 849                                                     |
| Goodness-of-fit                           | 1.037                                              | 1.077                                                            | 1.013                                                               |
| R1, wR2 [I>2σ(I)]                         | 0.0269, 0.0455                                     | 0.0348, 0.0533                                                   | 0.0226, 0.0478                                                      |

|                                                |                |                |                |
|------------------------------------------------|----------------|----------------|----------------|
| R1, wR2 (all data)                             | 0.0354, 0.0474 | 0.0478, 0.0582 | 0.0297, 0.0498 |
| Largest diff. peak and hole, e.Å <sup>-3</sup> | 0.959, -2.147  | 1.442, -1.378  | 0.850, -0.954  |
| CCDC                                           | 2292786        | 2292787        | 2292788        |

**TableS2.** Fragment of .prp file for the single crystal of **2\_1**.

SPACE GROUP DETERMINATION

| Lattice exceptions: | P   | A     | B     | C     | I     | F     | Obv   | Rev   | All   |
|---------------------|-----|-------|-------|-------|-------|-------|-------|-------|-------|
| N (total) =         | 0   | 48804 | 49064 | 48886 | 48872 | 73377 | 65126 | 65148 | 97728 |
| N (int>3sigma) =    | 0   | 38960 | 34978 | 39280 | 39183 | 56609 | 52235 | 52138 | 78149 |
| Mean intensity =    | 0.0 | 32.5  | 11.4  | 32.4  | 32.7  | 25.4  | 32.8  | 32.6  | 32.6  |
| Mean int/sigma =    | 0.0 | 15.0  | 10.2  | 15.0  | 15.0  | 13.4  | 15.0  | 15.0  | 15.0  |

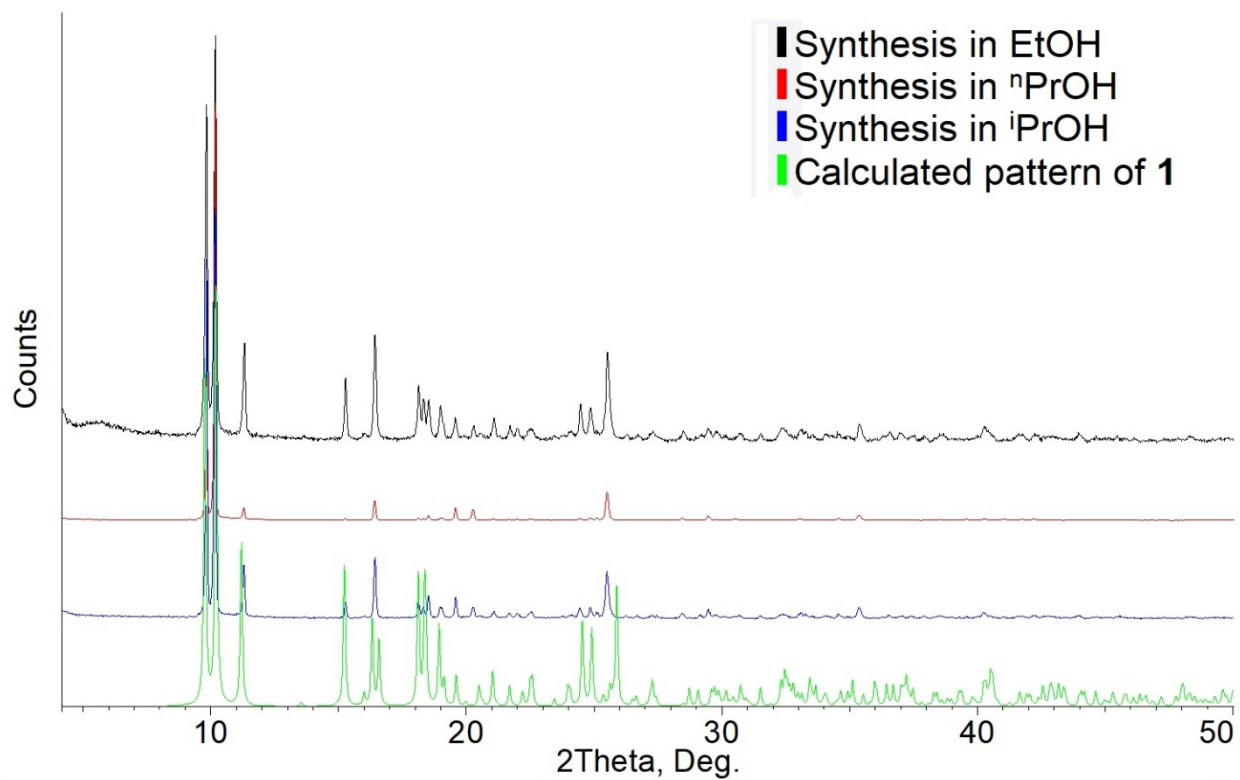

**Fig. S1.** Powder XRD patterns of products of syntheses of **1** in various alcohols compared to the calculated pattern of **1** structure.

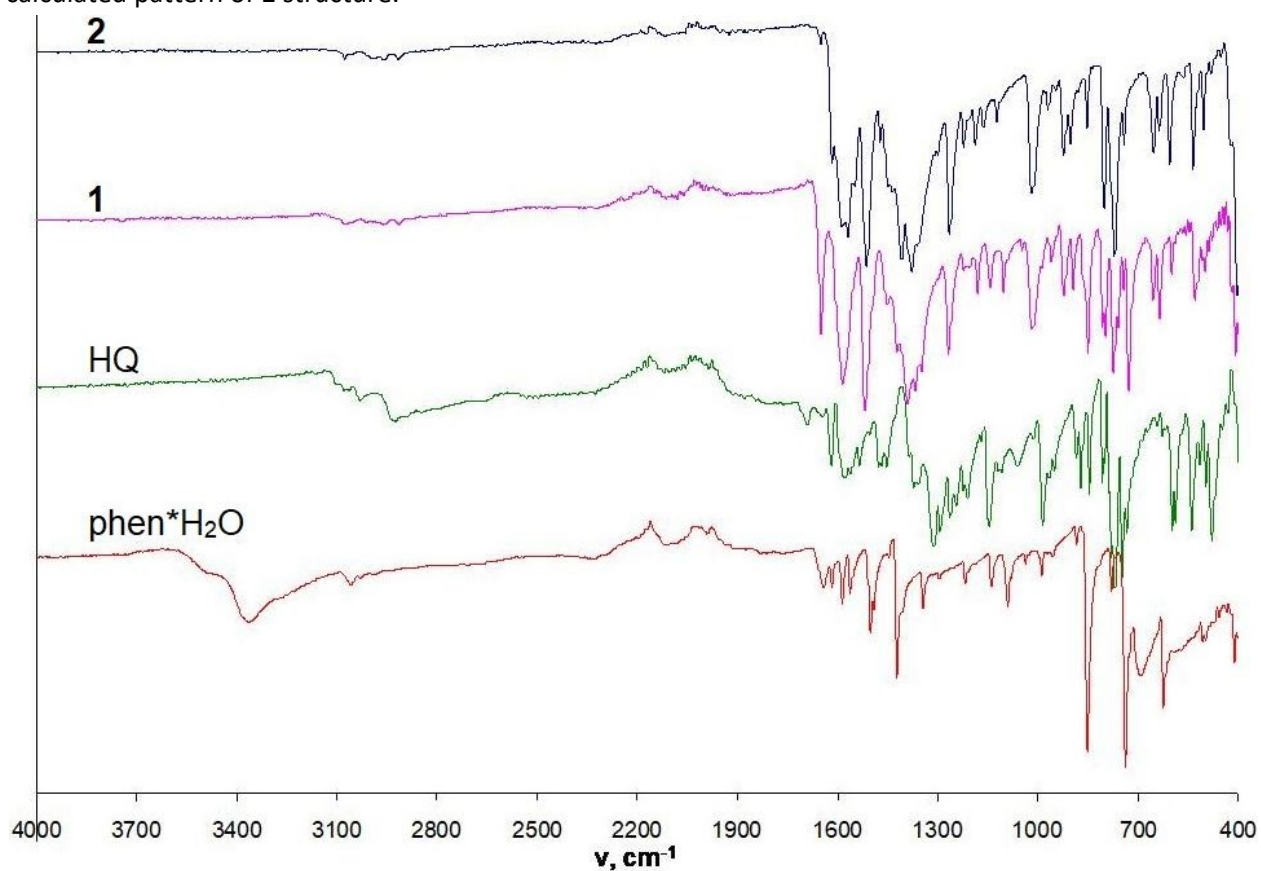

**Fig. S2.** IR spectra of complexes **1** and **2** compared with those of HQ and Phen-H<sub>2</sub>O.

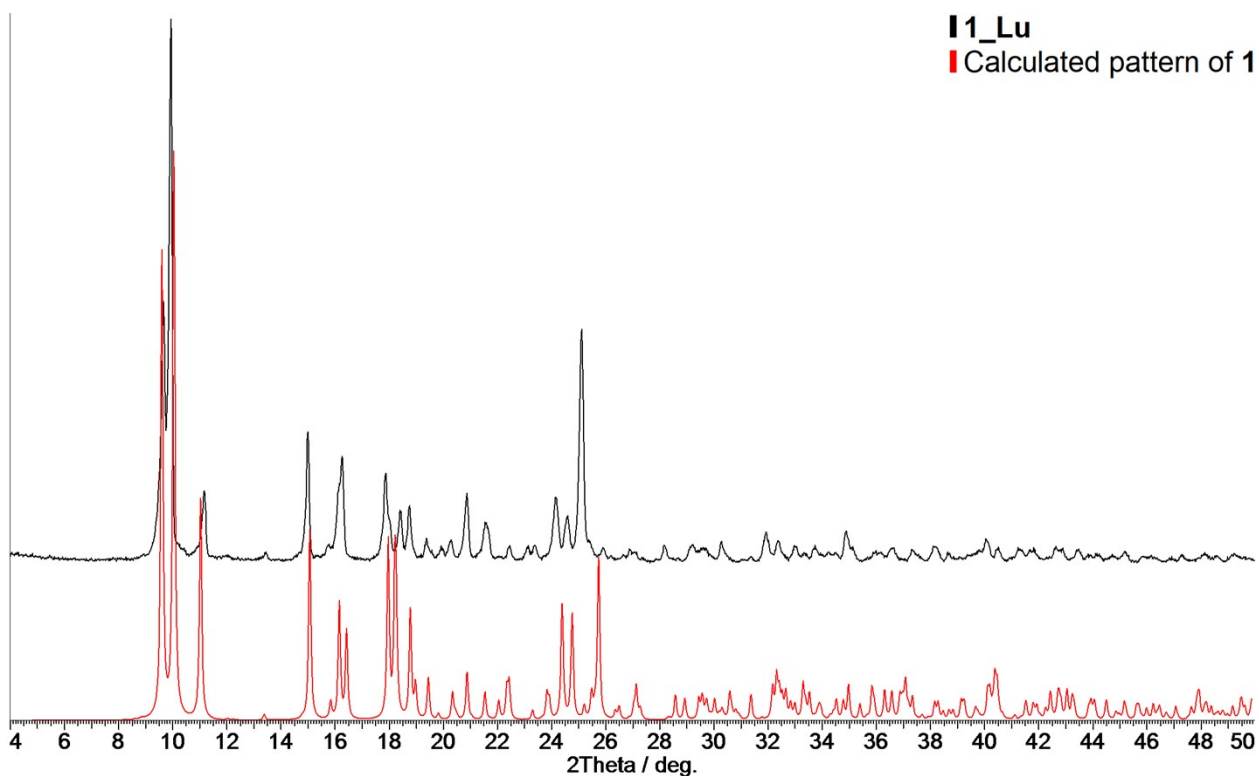

**Fig. S3.** Powder XRD pattern of the product of the synthesis of **1\_Lu** compared to calculated pattern of **1** structure.

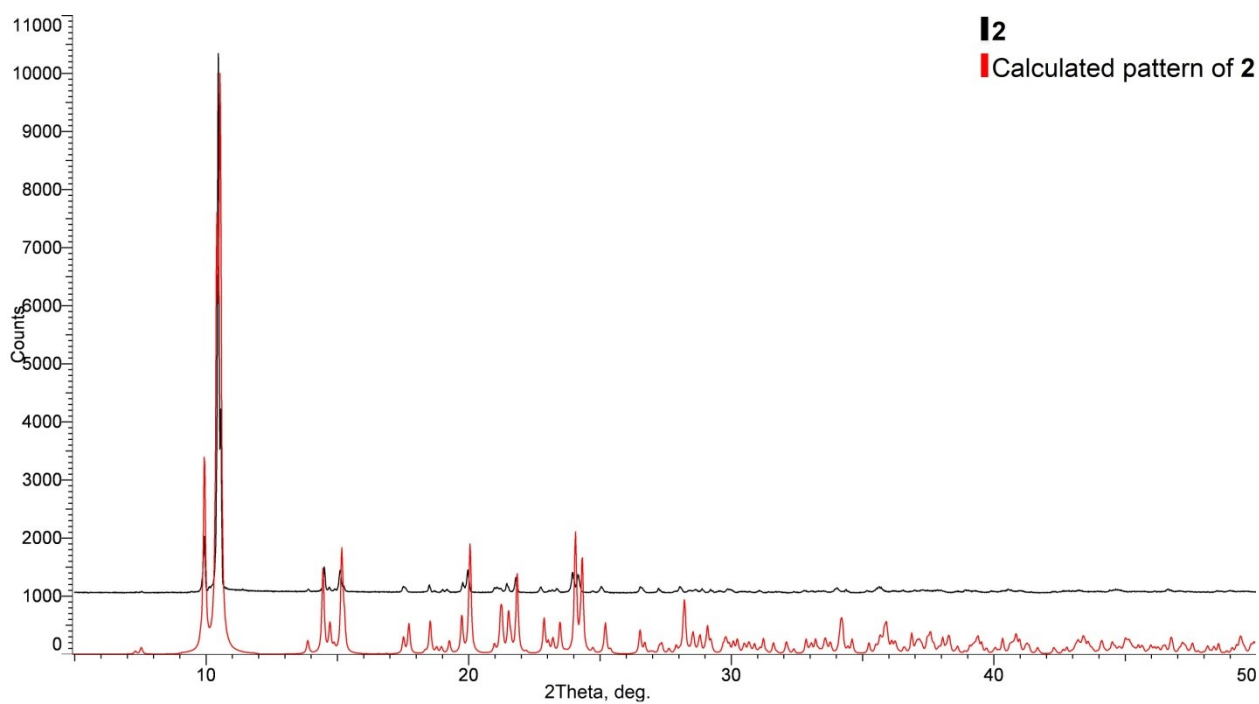

**Fig. S4.** Powder XRD pattern of the product of the synthesis of **2** compared to calculated pattern of **2** structure.

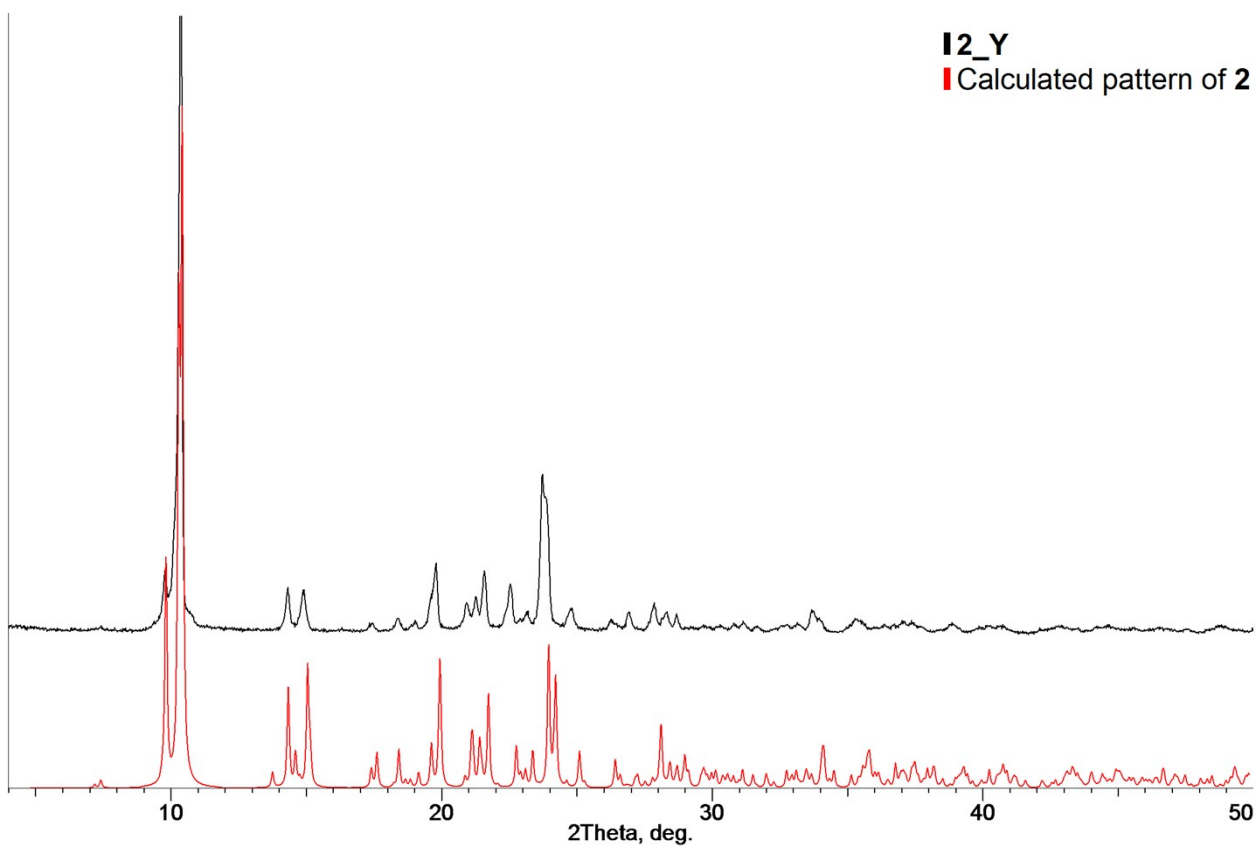

**Fig. S5.** Powder XRD pattern of the product of the synthesis of **2<sub>Y</sub>** compared to calculated pattern of **2** structure.

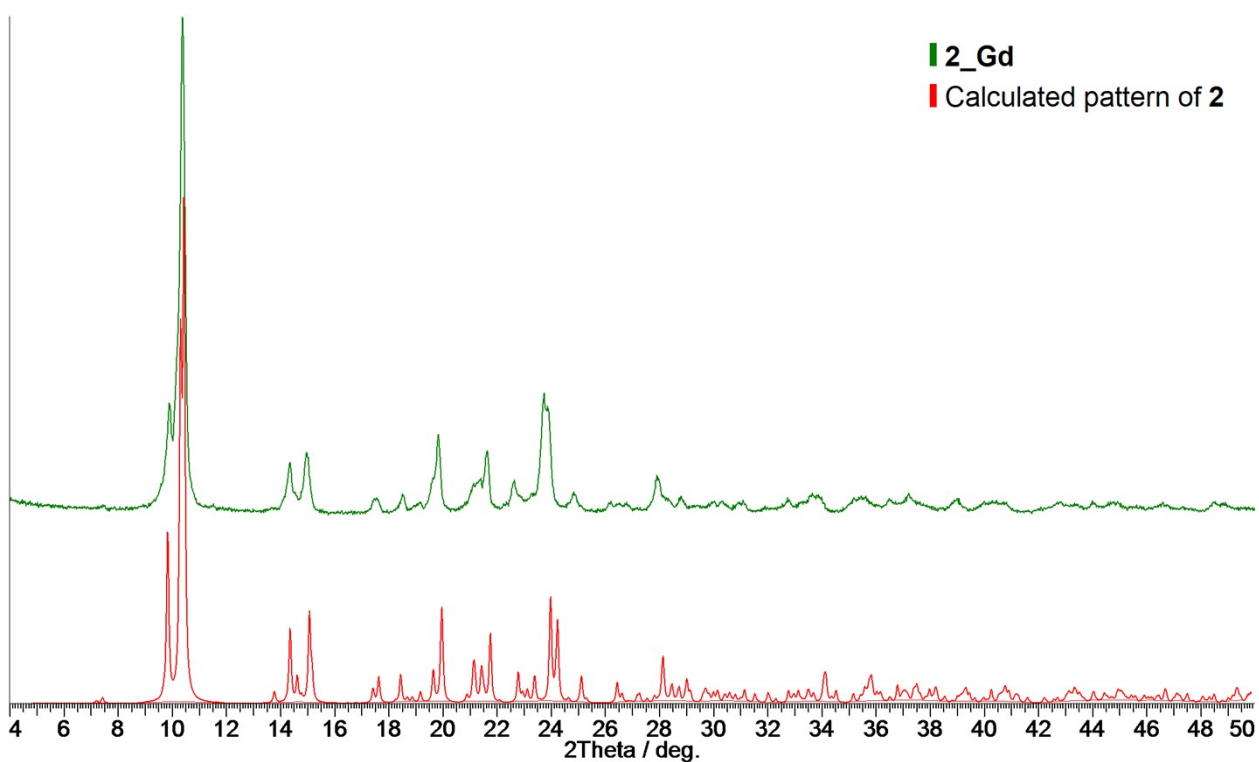

**Fig. S6.** Powder XRD pattern of the product of the synthesis of **2<sub>Gd</sub>** compared to calculated pattern of **2** structure.

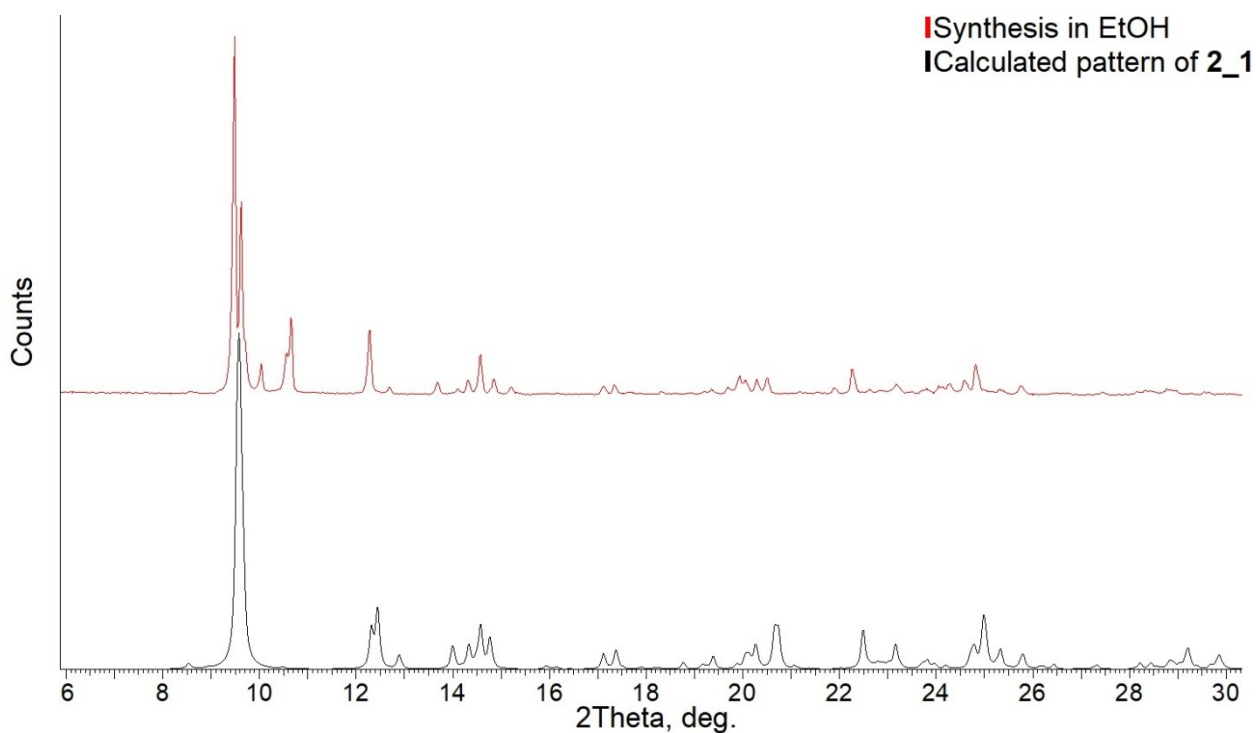

**Fig. S7.** Powder XRD pattern of the product of the synthesis of **2\_1** from EtOH compared to calculated pattern of **2\_1** structure.

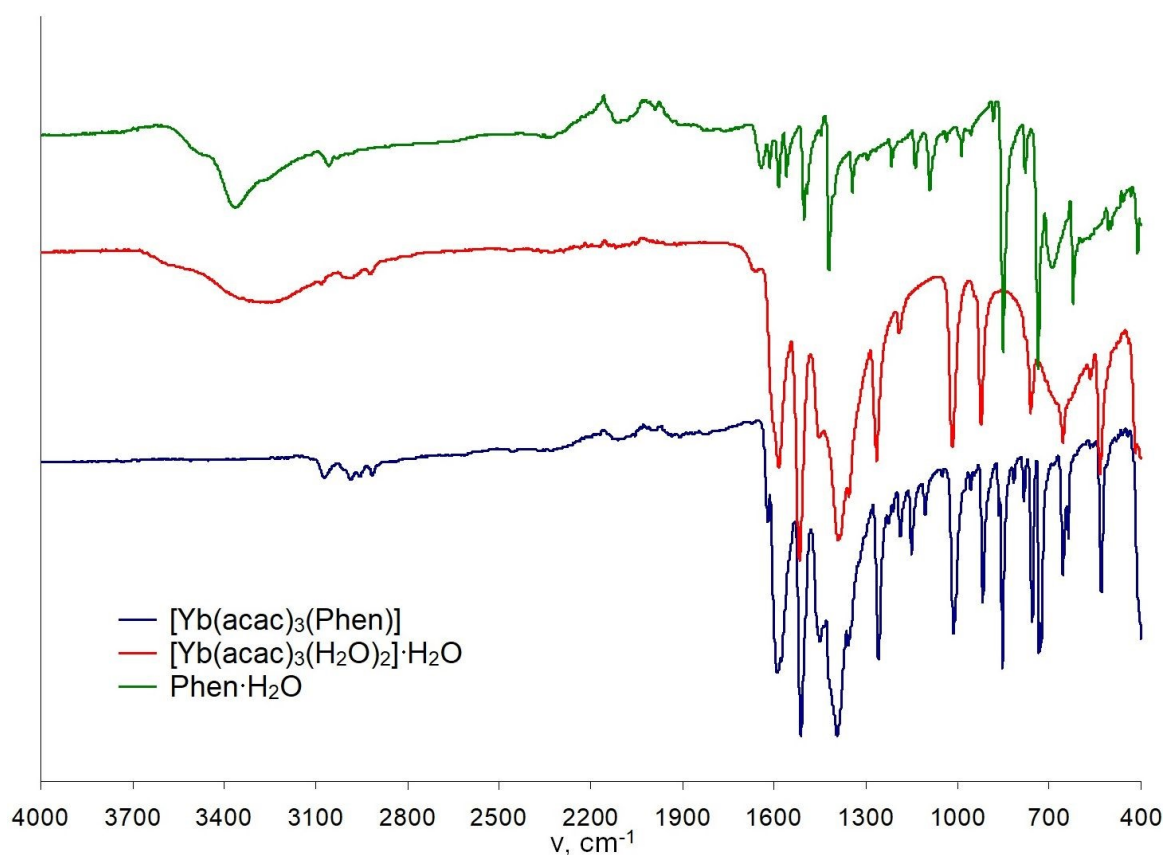

**Fig. S8.** IR spectrum of the intermediate product precipitated during the alternative synthesis of **2** (blue line, see *p.* 3.1. of the main text) compared with the spectra of Yb(acac)<sub>3</sub>·3H<sub>2</sub>O (red line) and Phen·H<sub>2</sub>O (green line).



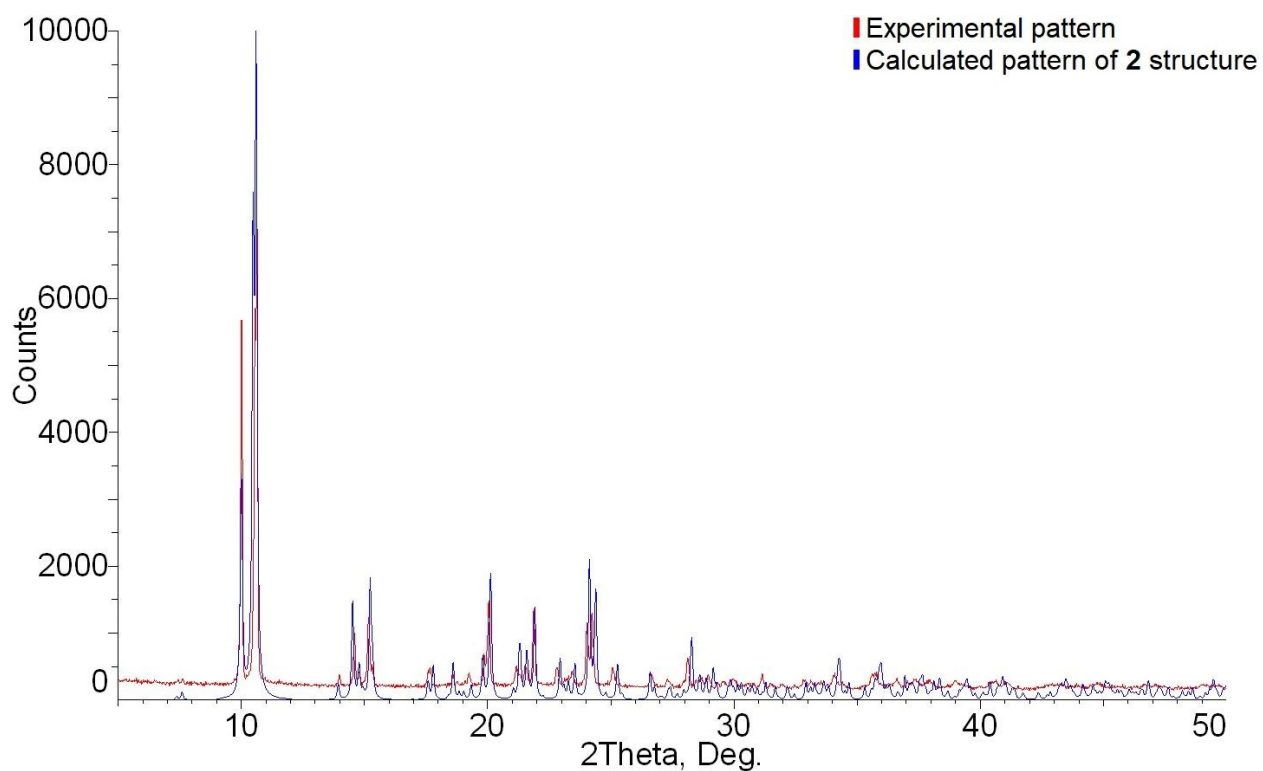

**Fig. S9.** Powder XRD pattern of the product isolated from the alternative synthesis of **2**(see *p. 3.1.* of the main text) compared to calculated pattern of **2**structure.

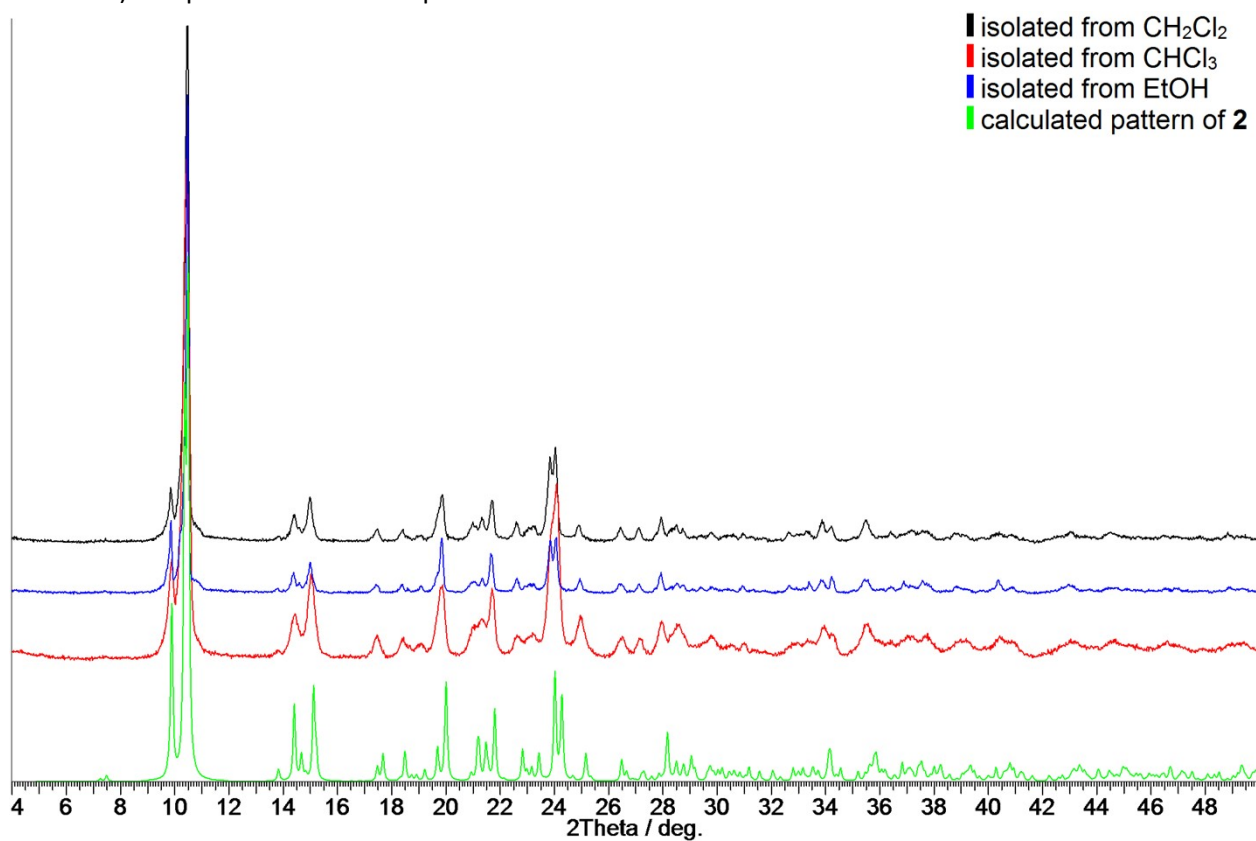

**Fig. S10.** Powder XRD patterns of the products isolated from the solutions of **2** in CH<sub>2</sub>Cl<sub>2</sub>, CHCl<sub>3</sub>and EtOH compared to calculated pattern of **2** structure.

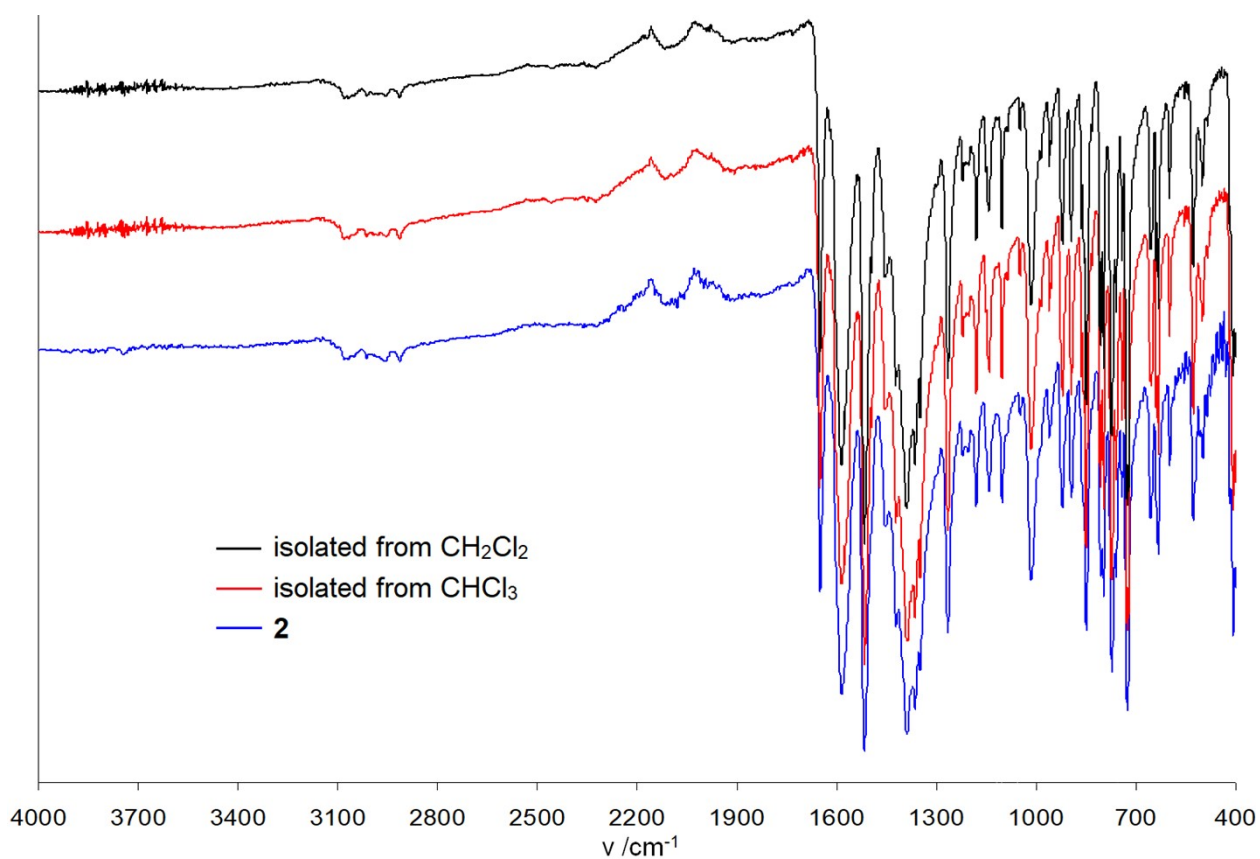

**Fig. S11.** IR spectra of the products isolated from the solutions of **2** in CH<sub>2</sub>Cl<sub>2</sub> and CHCl<sub>3</sub>.

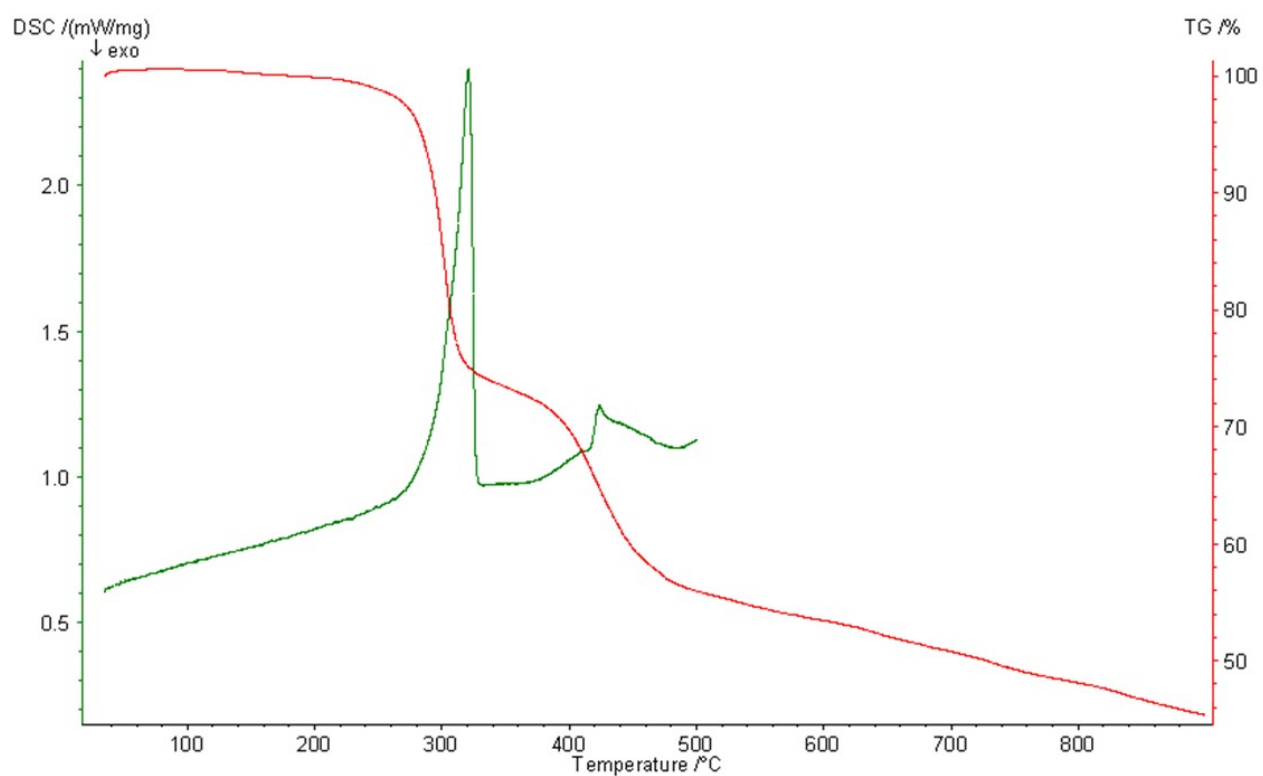

**Fig. S12.** TG (red) and DSC (green) curves of complex **1** on heating under Ar flow.

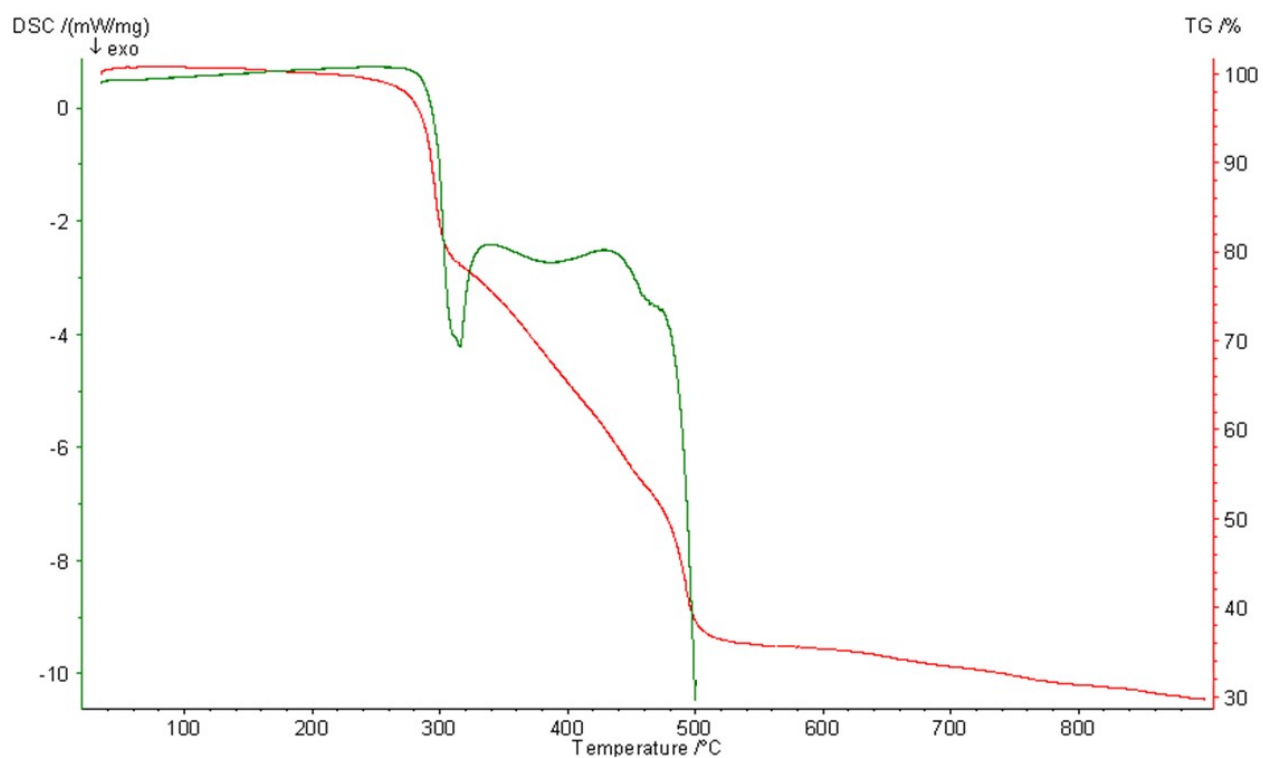

**Fig. S13.** TG (red) and DSC (green) curves of complex **1** on heating under artificial air flow.

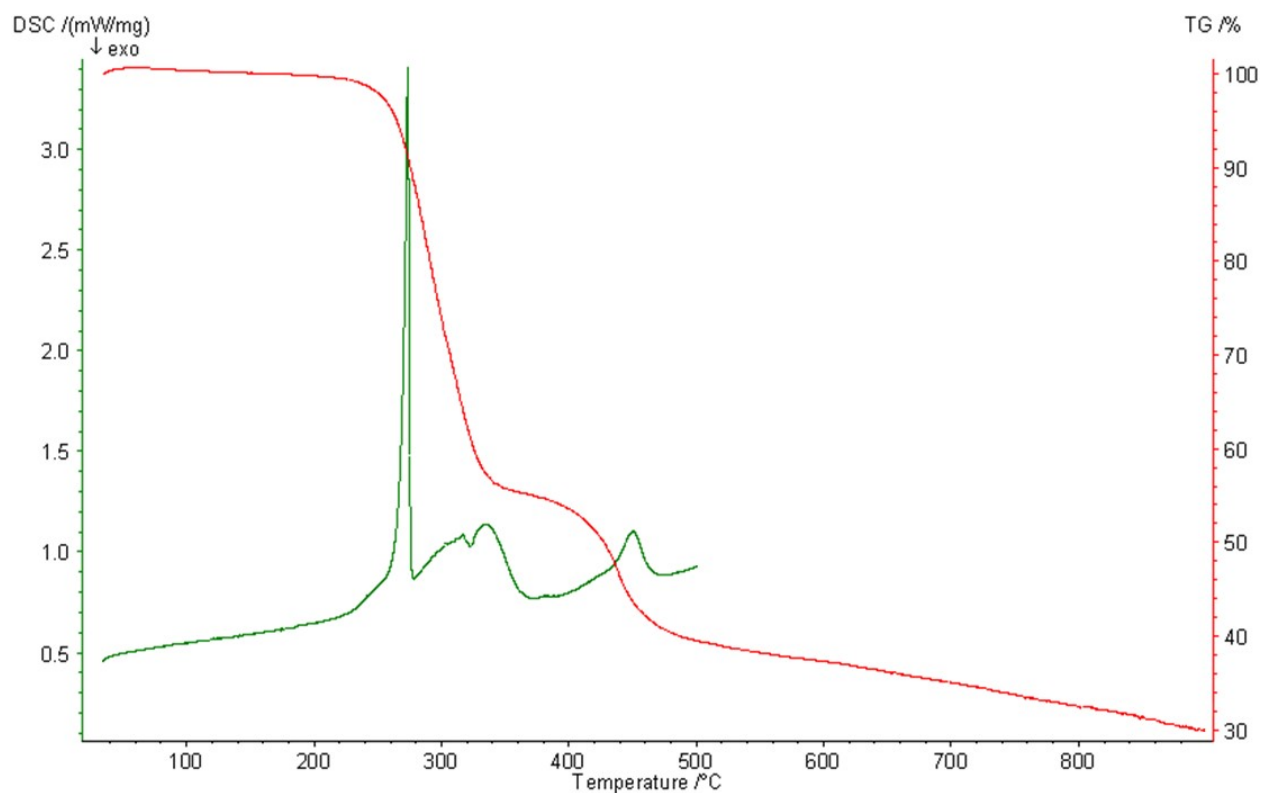

**Fig. S14.** TG (red) and DSC (green) curves of complex **2** on heating under Ar flow.

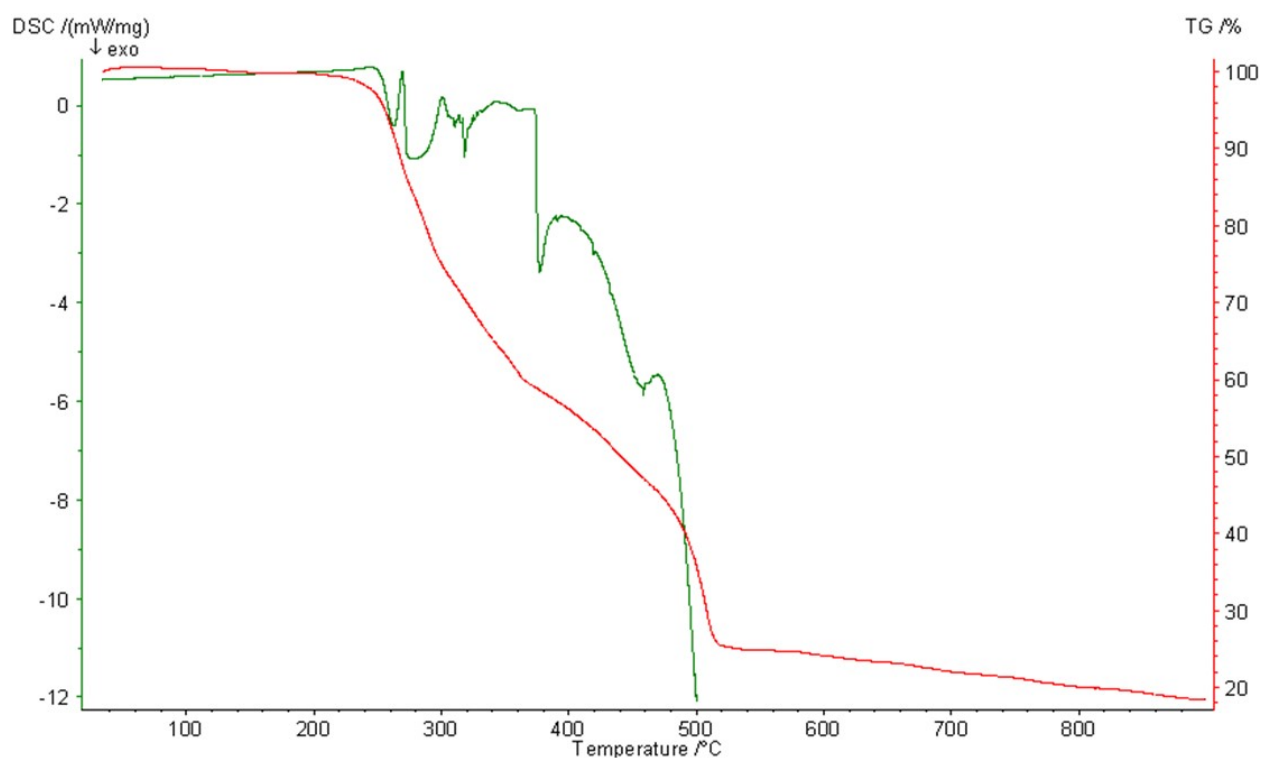

**Fig. S15.** TG (red) and DSC (green) curves of complex **2** on heating under artificial air flow.

**TableS3.** Shortest C...C contacts (Å) in stacking interactions within **1**, **2** and **2\_1** structures.

| <b>1</b>                         |       |
|----------------------------------|-------|
| C(2)...C(6) (-x, -y+1, -z)       | 3.346 |
| C(4)...C(4) (-x, -y+1, -z)       | 3.359 |
| <b>2</b>                         |       |
| C(1)...C(5) (-x, -y, -z+1)       | 3.331 |
| C(2)...C(6) (-x, -y, -z+1)       | 3.492 |
| C(3)...C(9) (-x, -y, -z+1)       | 3.407 |
| C(4)...C(4) (-x, -y, -z+1)       | 3.496 |
| C(22)...C(26) (-x+1, -y+1, -z)   | 3.311 |
| C(24)...C(24) (-x+1, -y+1, -z)   | 3.395 |
| <b>2_1</b>                       |       |
| C(1)...C(35)                     | 3.438 |
| C(3)...C(33)                     | 3.514 |
| C(5)...C(42)                     | 3.484 |
| C(10)...C(37)                    | 3.487 |
| C(22)...C(28) (-x, -y, -z+1)     | 3.421 |
| C(23)...C(27) (-x, -y, -z+1)     | 3.385 |
| C(23)...C(28) (-x, -y, -z+1)     | 3.410 |
| C(25)...C(32) (-x, -y, -z+1)     | 3.478 |
| C(55)...C(59) (-x+3, -y+2, -z+2) | 3.479 |
| C(55)...C(60) (-x+3, -y+2, -z+2) | 3.341 |
| C(56)...C(59) (-x+3, -y+2, -z+2) | 3.475 |
| C(58)...C(64) (-x+3, -y+2, -z+2) | 3.500 |

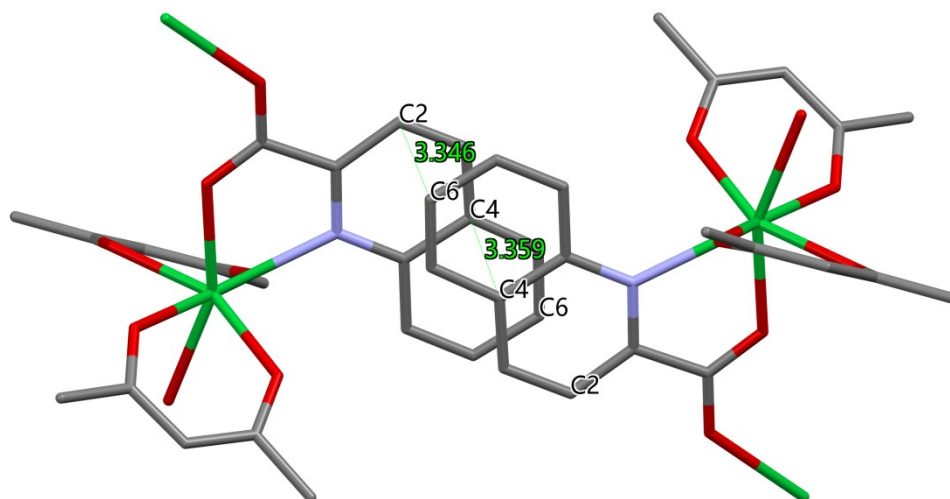

**Fig.S16.** Stacking interactions in the structure 1.

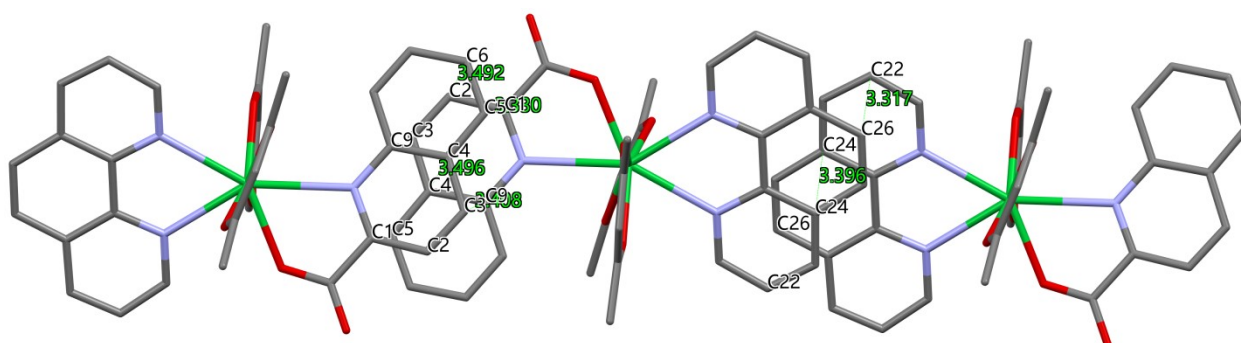

**Fig.S17.** Stacking interactions in the structure 2.

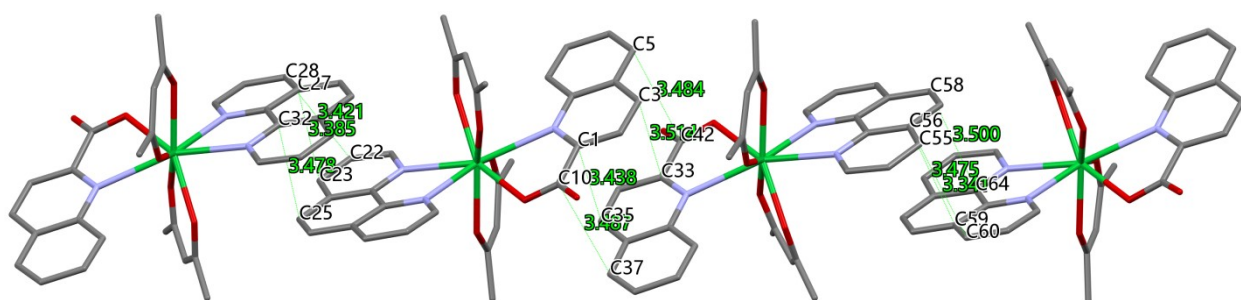

**Fig.S18.** Stacking interactions in the structure 2\_1.

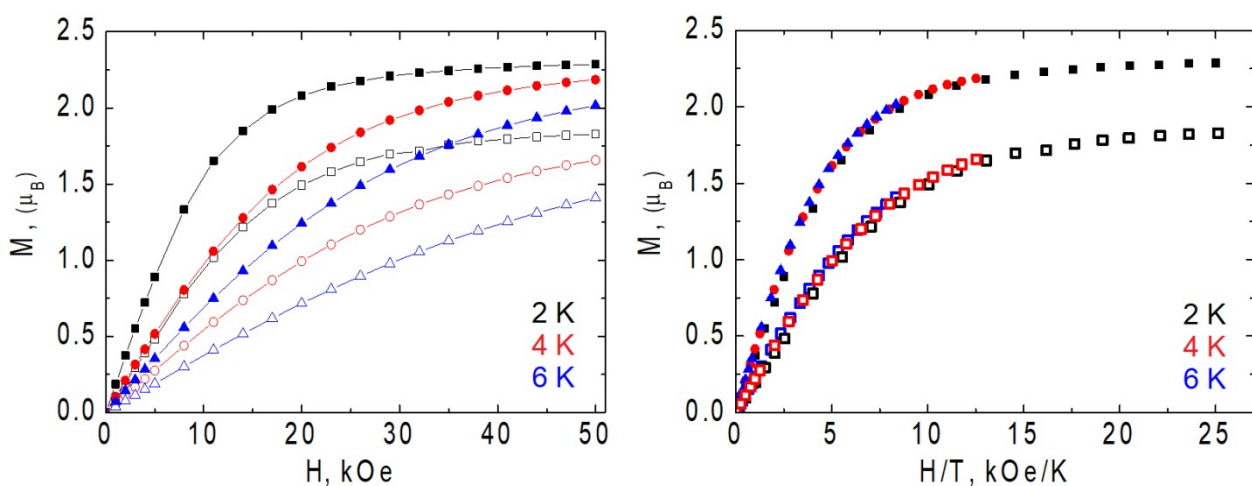

**Fig. S19.** Low-temperature magnetization vs.  $H$  (left) and vs.  $HT^{-1}$  (right) for complex **1** (per one  $\text{Yb}^{3+}$  ion, empty symbols) and **2** (filled symbols).

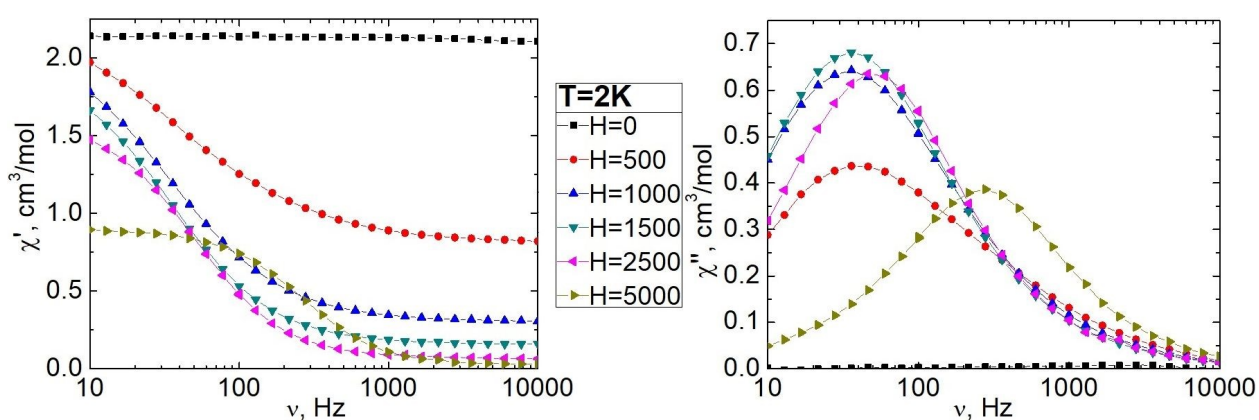

**Fig. S20.** Frequency dependencies of the in-phase ( $\chi'$ ) and out-of-phase ( $\chi''$ ) components of the dynamic magnetic susceptibility of **1** at varied strength of the external static magnetic field and  $T=2\text{K}$ . Solid lines are visual guides.

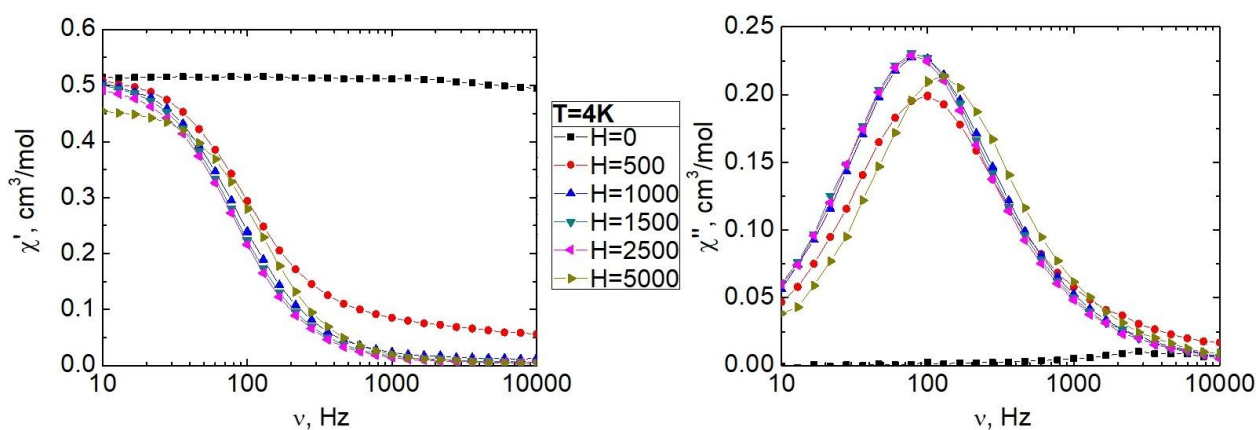

**Fig. S21.** Frequency dependencies of the in-phase ( $\chi'$ ) and out-of-phase ( $\chi''$ ) components of the dynamic magnetic susceptibility of **2** at varied strength of the external static magnetic field and  $T=4\text{K}$ . Solid lines are visual guides.

**Table S4.** Fitting of the  $\tau$  vs.  $T$  dependences for **1** ( $H_{DC} = 1.5$  kOe,  $T = 2-7$  K).

| Fitting                                                                                                                                                                                                                                                                                                                                                                                                                                                                                                                                                                                                                                                                                                                                                                                                                                                                                                                                                                                                                                                                                                                                                                                                                                                                                                                                              | Fit function, temperature range, and the best-fit parameters with uncertainties |                   |            |  |          |                                                                          |  |  |                 |             |  |  |               |         |  |  |  |       |                |  |     |         |            |            |     |         |          |         |                                                                                                                                                                                                                                              |           |            |           |          |                         |          |         |                 |           |      |   |                                                                                                                                                                                                                                                                                                  |         |  |  |  |       |                |  |     |   |            |            |     |   |         |         |                                                                                                                                                                                                                                                                                                                                                                                                                                                          |
|------------------------------------------------------------------------------------------------------------------------------------------------------------------------------------------------------------------------------------------------------------------------------------------------------------------------------------------------------------------------------------------------------------------------------------------------------------------------------------------------------------------------------------------------------------------------------------------------------------------------------------------------------------------------------------------------------------------------------------------------------------------------------------------------------------------------------------------------------------------------------------------------------------------------------------------------------------------------------------------------------------------------------------------------------------------------------------------------------------------------------------------------------------------------------------------------------------------------------------------------------------------------------------------------------------------------------------------------------|---------------------------------------------------------------------------------|-------------------|------------|--|----------|--------------------------------------------------------------------------|--|--|-----------------|-------------|--|--|---------------|---------|--|--|--|-------|----------------|--|-----|---------|------------|------------|-----|---------|----------|---------|----------------------------------------------------------------------------------------------------------------------------------------------------------------------------------------------------------------------------------------------|-----------|------------|-----------|----------|-------------------------|----------|---------|-----------------|-----------|------|---|--------------------------------------------------------------------------------------------------------------------------------------------------------------------------------------------------------------------------------------------------------------------------------------------------|---------|--|--|--|-------|----------------|--|-----|---|------------|------------|-----|---|---------|---------|----------------------------------------------------------------------------------------------------------------------------------------------------------------------------------------------------------------------------------------------------------------------------------------------------------------------------------------------------------------------------------------------------------------------------------------------------------|
| 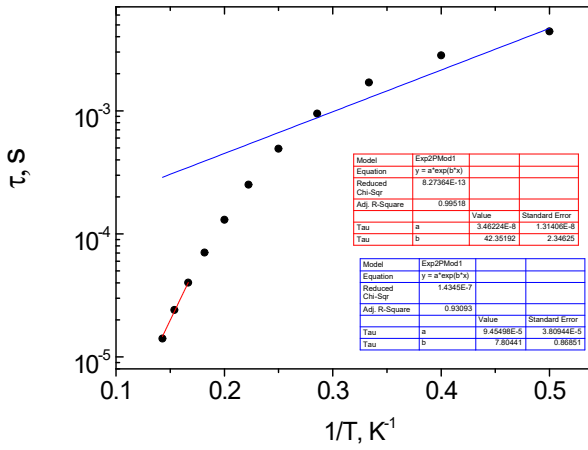 <table border="1" data-bbox="606 459 837 560"> <thead> <tr> <th>Model</th> <th>Exp2PMod1</th> <th></th> <th></th> </tr> </thead> <tbody> <tr> <td>Equation</td> <td><math>y = a \cdot \exp(b/x)</math></td> <td></td> <td></td> </tr> <tr> <td>Reduced Chi-Sqr</td> <td>8.27364E-13</td> <td></td> <td></td> </tr> <tr> <td>Adj. R-Square</td> <td>0.99518</td> <td></td> <td></td> </tr> <tr> <td></td> <td>Value</td> <td>Standard Error</td> <td></td> </tr> <tr> <td>Tau</td> <td>a</td> <td>3.46224E-8</td> <td>1.31469E-8</td> </tr> <tr> <td>Tau</td> <td>b</td> <td>42.35192</td> <td>2.34625</td> </tr> </tbody> </table> <table border="1" data-bbox="606 571 837 672"> <thead> <tr> <th>Model</th> <th>Exp2PMod1</th> <th></th> <th></th> </tr> </thead> <tbody> <tr> <td>Equation</td> <td><math>y = a \cdot \exp(b/x)</math></td> <td></td> <td></td> </tr> <tr> <td>Reduced Chi-Sqr</td> <td>1.4345E-7</td> <td></td> <td></td> </tr> <tr> <td>Adj. R-Square</td> <td>0.93093</td> <td></td> <td></td> </tr> <tr> <td></td> <td>Value</td> <td>Standard Error</td> <td></td> </tr> <tr> <td>Tau</td> <td>a</td> <td>9.45498E-5</td> <td>3.80944E-5</td> </tr> <tr> <td>Tau</td> <td>b</td> <td>7.82441</td> <td>0.93651</td> </tr> </tbody> </table> | Model                                                                           | Exp2PMod1         |            |  | Equation | $y = a \cdot \exp(b/x)$                                                  |  |  | Reduced Chi-Sqr | 8.27364E-13 |  |  | Adj. R-Square | 0.99518 |  |  |  | Value | Standard Error |  | Tau | a       | 3.46224E-8 | 1.31469E-8 | Tau | b       | 42.35192 | 2.34625 | Model                                                                                                                                                                                                                                        | Exp2PMod1 |            |           | Equation | $y = a \cdot \exp(b/x)$ |          |         | Reduced Chi-Sqr | 1.4345E-7 |      |   | Adj. R-Square                                                                                                                                                                                                                                                                                    | 0.93093 |  |  |  | Value | Standard Error |  | Tau | a | 9.45498E-5 | 3.80944E-5 | Tau | b | 7.82441 | 0.93651 | <p><b>Orbach</b><br/> <math>\tau = \tau_0 \cdot \exp(\Delta E/kT)</math></p> <p><math>T = 6-7</math> K<br/> <math>\Delta E/k = 42 \pm 2</math> K<br/> <math>\tau_0 = 3 \cdot 10^{-8} \pm 1 \cdot 10^{-8}</math> s<br/> <math>R^2 = 0.99518</math> (red line)</p> <p><math>T = 2-7</math> K<br/> <math>\Delta E/k = 7.8 \pm 0.9</math> K<br/> <math>\tau_0 = 9 \cdot 10^{-5} \pm 4 \cdot 10^{-5}</math> s<br/> <math>R^2 = 0.93093</math> (blue line)</p> |
| Model                                                                                                                                                                                                                                                                                                                                                                                                                                                                                                                                                                                                                                                                                                                                                                                                                                                                                                                                                                                                                                                                                                                                                                                                                                                                                                                                                | Exp2PMod1                                                                       |                   |            |  |          |                                                                          |  |  |                 |             |  |  |               |         |  |  |  |       |                |  |     |         |            |            |     |         |          |         |                                                                                                                                                                                                                                              |           |            |           |          |                         |          |         |                 |           |      |   |                                                                                                                                                                                                                                                                                                  |         |  |  |  |       |                |  |     |   |            |            |     |   |         |         |                                                                                                                                                                                                                                                                                                                                                                                                                                                          |
| Equation                                                                                                                                                                                                                                                                                                                                                                                                                                                                                                                                                                                                                                                                                                                                                                                                                                                                                                                                                                                                                                                                                                                                                                                                                                                                                                                                             | $y = a \cdot \exp(b/x)$                                                         |                   |            |  |          |                                                                          |  |  |                 |             |  |  |               |         |  |  |  |       |                |  |     |         |            |            |     |         |          |         |                                                                                                                                                                                                                                              |           |            |           |          |                         |          |         |                 |           |      |   |                                                                                                                                                                                                                                                                                                  |         |  |  |  |       |                |  |     |   |            |            |     |   |         |         |                                                                                                                                                                                                                                                                                                                                                                                                                                                          |
| Reduced Chi-Sqr                                                                                                                                                                                                                                                                                                                                                                                                                                                                                                                                                                                                                                                                                                                                                                                                                                                                                                                                                                                                                                                                                                                                                                                                                                                                                                                                      | 8.27364E-13                                                                     |                   |            |  |          |                                                                          |  |  |                 |             |  |  |               |         |  |  |  |       |                |  |     |         |            |            |     |         |          |         |                                                                                                                                                                                                                                              |           |            |           |          |                         |          |         |                 |           |      |   |                                                                                                                                                                                                                                                                                                  |         |  |  |  |       |                |  |     |   |            |            |     |   |         |         |                                                                                                                                                                                                                                                                                                                                                                                                                                                          |
| Adj. R-Square                                                                                                                                                                                                                                                                                                                                                                                                                                                                                                                                                                                                                                                                                                                                                                                                                                                                                                                                                                                                                                                                                                                                                                                                                                                                                                                                        | 0.99518                                                                         |                   |            |  |          |                                                                          |  |  |                 |             |  |  |               |         |  |  |  |       |                |  |     |         |            |            |     |         |          |         |                                                                                                                                                                                                                                              |           |            |           |          |                         |          |         |                 |           |      |   |                                                                                                                                                                                                                                                                                                  |         |  |  |  |       |                |  |     |   |            |            |     |   |         |         |                                                                                                                                                                                                                                                                                                                                                                                                                                                          |
|                                                                                                                                                                                                                                                                                                                                                                                                                                                                                                                                                                                                                                                                                                                                                                                                                                                                                                                                                                                                                                                                                                                                                                                                                                                                                                                                                      | Value                                                                           | Standard Error    |            |  |          |                                                                          |  |  |                 |             |  |  |               |         |  |  |  |       |                |  |     |         |            |            |     |         |          |         |                                                                                                                                                                                                                                              |           |            |           |          |                         |          |         |                 |           |      |   |                                                                                                                                                                                                                                                                                                  |         |  |  |  |       |                |  |     |   |            |            |     |   |         |         |                                                                                                                                                                                                                                                                                                                                                                                                                                                          |
| Tau                                                                                                                                                                                                                                                                                                                                                                                                                                                                                                                                                                                                                                                                                                                                                                                                                                                                                                                                                                                                                                                                                                                                                                                                                                                                                                                                                  | a                                                                               | 3.46224E-8        | 1.31469E-8 |  |          |                                                                          |  |  |                 |             |  |  |               |         |  |  |  |       |                |  |     |         |            |            |     |         |          |         |                                                                                                                                                                                                                                              |           |            |           |          |                         |          |         |                 |           |      |   |                                                                                                                                                                                                                                                                                                  |         |  |  |  |       |                |  |     |   |            |            |     |   |         |         |                                                                                                                                                                                                                                                                                                                                                                                                                                                          |
| Tau                                                                                                                                                                                                                                                                                                                                                                                                                                                                                                                                                                                                                                                                                                                                                                                                                                                                                                                                                                                                                                                                                                                                                                                                                                                                                                                                                  | b                                                                               | 42.35192          | 2.34625    |  |          |                                                                          |  |  |                 |             |  |  |               |         |  |  |  |       |                |  |     |         |            |            |     |         |          |         |                                                                                                                                                                                                                                              |           |            |           |          |                         |          |         |                 |           |      |   |                                                                                                                                                                                                                                                                                                  |         |  |  |  |       |                |  |     |   |            |            |     |   |         |         |                                                                                                                                                                                                                                                                                                                                                                                                                                                          |
| Model                                                                                                                                                                                                                                                                                                                                                                                                                                                                                                                                                                                                                                                                                                                                                                                                                                                                                                                                                                                                                                                                                                                                                                                                                                                                                                                                                | Exp2PMod1                                                                       |                   |            |  |          |                                                                          |  |  |                 |             |  |  |               |         |  |  |  |       |                |  |     |         |            |            |     |         |          |         |                                                                                                                                                                                                                                              |           |            |           |          |                         |          |         |                 |           |      |   |                                                                                                                                                                                                                                                                                                  |         |  |  |  |       |                |  |     |   |            |            |     |   |         |         |                                                                                                                                                                                                                                                                                                                                                                                                                                                          |
| Equation                                                                                                                                                                                                                                                                                                                                                                                                                                                                                                                                                                                                                                                                                                                                                                                                                                                                                                                                                                                                                                                                                                                                                                                                                                                                                                                                             | $y = a \cdot \exp(b/x)$                                                         |                   |            |  |          |                                                                          |  |  |                 |             |  |  |               |         |  |  |  |       |                |  |     |         |            |            |     |         |          |         |                                                                                                                                                                                                                                              |           |            |           |          |                         |          |         |                 |           |      |   |                                                                                                                                                                                                                                                                                                  |         |  |  |  |       |                |  |     |   |            |            |     |   |         |         |                                                                                                                                                                                                                                                                                                                                                                                                                                                          |
| Reduced Chi-Sqr                                                                                                                                                                                                                                                                                                                                                                                                                                                                                                                                                                                                                                                                                                                                                                                                                                                                                                                                                                                                                                                                                                                                                                                                                                                                                                                                      | 1.4345E-7                                                                       |                   |            |  |          |                                                                          |  |  |                 |             |  |  |               |         |  |  |  |       |                |  |     |         |            |            |     |         |          |         |                                                                                                                                                                                                                                              |           |            |           |          |                         |          |         |                 |           |      |   |                                                                                                                                                                                                                                                                                                  |         |  |  |  |       |                |  |     |   |            |            |     |   |         |         |                                                                                                                                                                                                                                                                                                                                                                                                                                                          |
| Adj. R-Square                                                                                                                                                                                                                                                                                                                                                                                                                                                                                                                                                                                                                                                                                                                                                                                                                                                                                                                                                                                                                                                                                                                                                                                                                                                                                                                                        | 0.93093                                                                         |                   |            |  |          |                                                                          |  |  |                 |             |  |  |               |         |  |  |  |       |                |  |     |         |            |            |     |         |          |         |                                                                                                                                                                                                                                              |           |            |           |          |                         |          |         |                 |           |      |   |                                                                                                                                                                                                                                                                                                  |         |  |  |  |       |                |  |     |   |            |            |     |   |         |         |                                                                                                                                                                                                                                                                                                                                                                                                                                                          |
|                                                                                                                                                                                                                                                                                                                                                                                                                                                                                                                                                                                                                                                                                                                                                                                                                                                                                                                                                                                                                                                                                                                                                                                                                                                                                                                                                      | Value                                                                           | Standard Error    |            |  |          |                                                                          |  |  |                 |             |  |  |               |         |  |  |  |       |                |  |     |         |            |            |     |         |          |         |                                                                                                                                                                                                                                              |           |            |           |          |                         |          |         |                 |           |      |   |                                                                                                                                                                                                                                                                                                  |         |  |  |  |       |                |  |     |   |            |            |     |   |         |         |                                                                                                                                                                                                                                                                                                                                                                                                                                                          |
| Tau                                                                                                                                                                                                                                                                                                                                                                                                                                                                                                                                                                                                                                                                                                                                                                                                                                                                                                                                                                                                                                                                                                                                                                                                                                                                                                                                                  | a                                                                               | 9.45498E-5        | 3.80944E-5 |  |          |                                                                          |  |  |                 |             |  |  |               |         |  |  |  |       |                |  |     |         |            |            |     |         |          |         |                                                                                                                                                                                                                                              |           |            |           |          |                         |          |         |                 |           |      |   |                                                                                                                                                                                                                                                                                                  |         |  |  |  |       |                |  |     |   |            |            |     |   |         |         |                                                                                                                                                                                                                                                                                                                                                                                                                                                          |
| Tau                                                                                                                                                                                                                                                                                                                                                                                                                                                                                                                                                                                                                                                                                                                                                                                                                                                                                                                                                                                                                                                                                                                                                                                                                                                                                                                                                  | b                                                                               | 7.82441           | 0.93651    |  |          |                                                                          |  |  |                 |             |  |  |               |         |  |  |  |       |                |  |     |         |            |            |     |         |          |         |                                                                                                                                                                                                                                              |           |            |           |          |                         |          |         |                 |           |      |   |                                                                                                                                                                                                                                                                                                  |         |  |  |  |       |                |  |     |   |            |            |     |   |         |         |                                                                                                                                                                                                                                                                                                                                                                                                                                                          |
|  <table border="1" data-bbox="590 996 821 1176"> <thead> <tr> <th>Model</th> <th>Orbach_QTM (User)</th> <th></th> <th></th> </tr> </thead> <tbody> <tr> <td>Equation</td> <td><math>1/(C \cdot \tau_0 \cdot (1 - \exp(-\Delta E/kT)) + B(1 + B \cdot T^2))</math></td> <td></td> <td></td> </tr> <tr> <td>Reduced Chi-Sqr</td> <td>1.00548E-8</td> <td></td> <td></td> </tr> <tr> <td>Adj. R-Square</td> <td>0.99518</td> <td></td> <td></td> </tr> <tr> <td></td> <td>Value</td> <td>Standard Error</td> <td></td> </tr> <tr> <td>Tau</td> <td>B1</td> <td>205.42976</td> <td>8.38871</td> </tr> <tr> <td>Tau</td> <td>B2</td> <td>0</td> <td>0</td> </tr> <tr> <td>Tau</td> <td>Tau0</td> <td>6.86132E-6</td> <td>2.6518E-6</td> </tr> <tr> <td>Tau</td> <td>U0</td> <td>17.48561</td> <td>1.19547</td> </tr> <tr> <td>Tau</td> <td>H</td> <td>1500</td> <td>0</td> </tr> </tbody> </table>                                                                                                                                                                                                                                                                                                                                                                      | Model                                                                           | Orbach_QTM (User) |            |  | Equation | $1/(C \cdot \tau_0 \cdot (1 - \exp(-\Delta E/kT)) + B(1 + B \cdot T^2))$ |  |  | Reduced Chi-Sqr | 1.00548E-8  |  |  | Adj. R-Square | 0.99518 |  |  |  | Value | Standard Error |  | Tau | B1      | 205.42976  | 8.38871    | Tau | B2      | 0        | 0       | Tau                                                                                                                                                                                                                                          | Tau0      | 6.86132E-6 | 2.6518E-6 | Tau      | U0                      | 17.48561 | 1.19547 | Tau             | H         | 1500 | 0 | <p><b>Orbach+QTM</b><br/> <math>\tau^{-1} = \tau_0^{-1} \cdot \exp(-\Delta E/kT) + B</math></p> <p><math>\Delta E/k = 17 \pm 1</math> K<br/> <math>\tau_0 = 7 \cdot 10^{-6} \pm 3 \cdot 10^{-6}</math> s<br/> <math>B = 205 \pm 8</math> s<math>^{-1}</math><br/> <math>R^2 = 0.99516</math></p> |         |  |  |  |       |                |  |     |   |            |            |     |   |         |         |                                                                                                                                                                                                                                                                                                                                                                                                                                                          |
| Model                                                                                                                                                                                                                                                                                                                                                                                                                                                                                                                                                                                                                                                                                                                                                                                                                                                                                                                                                                                                                                                                                                                                                                                                                                                                                                                                                | Orbach_QTM (User)                                                               |                   |            |  |          |                                                                          |  |  |                 |             |  |  |               |         |  |  |  |       |                |  |     |         |            |            |     |         |          |         |                                                                                                                                                                                                                                              |           |            |           |          |                         |          |         |                 |           |      |   |                                                                                                                                                                                                                                                                                                  |         |  |  |  |       |                |  |     |   |            |            |     |   |         |         |                                                                                                                                                                                                                                                                                                                                                                                                                                                          |
| Equation                                                                                                                                                                                                                                                                                                                                                                                                                                                                                                                                                                                                                                                                                                                                                                                                                                                                                                                                                                                                                                                                                                                                                                                                                                                                                                                                             | $1/(C \cdot \tau_0 \cdot (1 - \exp(-\Delta E/kT)) + B(1 + B \cdot T^2))$        |                   |            |  |          |                                                                          |  |  |                 |             |  |  |               |         |  |  |  |       |                |  |     |         |            |            |     |         |          |         |                                                                                                                                                                                                                                              |           |            |           |          |                         |          |         |                 |           |      |   |                                                                                                                                                                                                                                                                                                  |         |  |  |  |       |                |  |     |   |            |            |     |   |         |         |                                                                                                                                                                                                                                                                                                                                                                                                                                                          |
| Reduced Chi-Sqr                                                                                                                                                                                                                                                                                                                                                                                                                                                                                                                                                                                                                                                                                                                                                                                                                                                                                                                                                                                                                                                                                                                                                                                                                                                                                                                                      | 1.00548E-8                                                                      |                   |            |  |          |                                                                          |  |  |                 |             |  |  |               |         |  |  |  |       |                |  |     |         |            |            |     |         |          |         |                                                                                                                                                                                                                                              |           |            |           |          |                         |          |         |                 |           |      |   |                                                                                                                                                                                                                                                                                                  |         |  |  |  |       |                |  |     |   |            |            |     |   |         |         |                                                                                                                                                                                                                                                                                                                                                                                                                                                          |
| Adj. R-Square                                                                                                                                                                                                                                                                                                                                                                                                                                                                                                                                                                                                                                                                                                                                                                                                                                                                                                                                                                                                                                                                                                                                                                                                                                                                                                                                        | 0.99518                                                                         |                   |            |  |          |                                                                          |  |  |                 |             |  |  |               |         |  |  |  |       |                |  |     |         |            |            |     |         |          |         |                                                                                                                                                                                                                                              |           |            |           |          |                         |          |         |                 |           |      |   |                                                                                                                                                                                                                                                                                                  |         |  |  |  |       |                |  |     |   |            |            |     |   |         |         |                                                                                                                                                                                                                                                                                                                                                                                                                                                          |
|                                                                                                                                                                                                                                                                                                                                                                                                                                                                                                                                                                                                                                                                                                                                                                                                                                                                                                                                                                                                                                                                                                                                                                                                                                                                                                                                                      | Value                                                                           | Standard Error    |            |  |          |                                                                          |  |  |                 |             |  |  |               |         |  |  |  |       |                |  |     |         |            |            |     |         |          |         |                                                                                                                                                                                                                                              |           |            |           |          |                         |          |         |                 |           |      |   |                                                                                                                                                                                                                                                                                                  |         |  |  |  |       |                |  |     |   |            |            |     |   |         |         |                                                                                                                                                                                                                                                                                                                                                                                                                                                          |
| Tau                                                                                                                                                                                                                                                                                                                                                                                                                                                                                                                                                                                                                                                                                                                                                                                                                                                                                                                                                                                                                                                                                                                                                                                                                                                                                                                                                  | B1                                                                              | 205.42976         | 8.38871    |  |          |                                                                          |  |  |                 |             |  |  |               |         |  |  |  |       |                |  |     |         |            |            |     |         |          |         |                                                                                                                                                                                                                                              |           |            |           |          |                         |          |         |                 |           |      |   |                                                                                                                                                                                                                                                                                                  |         |  |  |  |       |                |  |     |   |            |            |     |   |         |         |                                                                                                                                                                                                                                                                                                                                                                                                                                                          |
| Tau                                                                                                                                                                                                                                                                                                                                                                                                                                                                                                                                                                                                                                                                                                                                                                                                                                                                                                                                                                                                                                                                                                                                                                                                                                                                                                                                                  | B2                                                                              | 0                 | 0          |  |          |                                                                          |  |  |                 |             |  |  |               |         |  |  |  |       |                |  |     |         |            |            |     |         |          |         |                                                                                                                                                                                                                                              |           |            |           |          |                         |          |         |                 |           |      |   |                                                                                                                                                                                                                                                                                                  |         |  |  |  |       |                |  |     |   |            |            |     |   |         |         |                                                                                                                                                                                                                                                                                                                                                                                                                                                          |
| Tau                                                                                                                                                                                                                                                                                                                                                                                                                                                                                                                                                                                                                                                                                                                                                                                                                                                                                                                                                                                                                                                                                                                                                                                                                                                                                                                                                  | Tau0                                                                            | 6.86132E-6        | 2.6518E-6  |  |          |                                                                          |  |  |                 |             |  |  |               |         |  |  |  |       |                |  |     |         |            |            |     |         |          |         |                                                                                                                                                                                                                                              |           |            |           |          |                         |          |         |                 |           |      |   |                                                                                                                                                                                                                                                                                                  |         |  |  |  |       |                |  |     |   |            |            |     |   |         |         |                                                                                                                                                                                                                                                                                                                                                                                                                                                          |
| Tau                                                                                                                                                                                                                                                                                                                                                                                                                                                                                                                                                                                                                                                                                                                                                                                                                                                                                                                                                                                                                                                                                                                                                                                                                                                                                                                                                  | U0                                                                              | 17.48561          | 1.19547    |  |          |                                                                          |  |  |                 |             |  |  |               |         |  |  |  |       |                |  |     |         |            |            |     |         |          |         |                                                                                                                                                                                                                                              |           |            |           |          |                         |          |         |                 |           |      |   |                                                                                                                                                                                                                                                                                                  |         |  |  |  |       |                |  |     |   |            |            |     |   |         |         |                                                                                                                                                                                                                                                                                                                                                                                                                                                          |
| Tau                                                                                                                                                                                                                                                                                                                                                                                                                                                                                                                                                                                                                                                                                                                                                                                                                                                                                                                                                                                                                                                                                                                                                                                                                                                                                                                                                  | H                                                                               | 1500              | 0          |  |          |                                                                          |  |  |                 |             |  |  |               |         |  |  |  |       |                |  |     |         |            |            |     |         |          |         |                                                                                                                                                                                                                                              |           |            |           |          |                         |          |         |                 |           |      |   |                                                                                                                                                                                                                                                                                                  |         |  |  |  |       |                |  |     |   |            |            |     |   |         |         |                                                                                                                                                                                                                                                                                                                                                                                                                                                          |
|  <table border="1" data-bbox="590 1512 821 1624"> <thead> <tr> <th>Model</th> <th>Raman (User)</th> <th></th> <th></th> </tr> </thead> <tbody> <tr> <td>Equation</td> <td><math>1/(C_{Raman} \cdot T^{n_{Raman}})</math></td> <td></td> <td></td> </tr> <tr> <td>Reduced Chi-Sqr</td> <td>4.99235E-8</td> <td></td> <td></td> </tr> <tr> <td>Adj. R-Square</td> <td>0.97596</td> <td></td> <td></td> </tr> <tr> <td></td> <td>Value</td> <td>Standard Error</td> <td></td> </tr> <tr> <td>Tau</td> <td>C_Raman</td> <td>30.50129</td> <td>5.26425</td> </tr> <tr> <td>Tau</td> <td>n_Raman</td> <td>2.83153</td> <td>0.20902</td> </tr> </tbody> </table>                                                                                                                                                                                                                                                                                                                                                                                                                                                                                                                                                                                                         | Model                                                                           | Raman (User)      |            |  | Equation | $1/(C_{Raman} \cdot T^{n_{Raman}})$                                      |  |  | Reduced Chi-Sqr | 4.99235E-8  |  |  | Adj. R-Square | 0.97596 |  |  |  | Value | Standard Error |  | Tau | C_Raman | 30.50129   | 5.26425    | Tau | n_Raman | 2.83153  | 0.20902 | <p><b>Raman</b><br/> <math>\tau^{-1} = C_{Raman} T^{n_{Raman}}</math></p> <p><math>C_{Raman} = 31 \pm 5</math> s<math>^{-1}</math> K<math>^{-n_{Raman}}</math><br/> <math>n_{Raman} = 2.8 \pm 0.2</math><br/> <math>R^2 = 0.97596</math></p> |           |            |           |          |                         |          |         |                 |           |      |   |                                                                                                                                                                                                                                                                                                  |         |  |  |  |       |                |  |     |   |            |            |     |   |         |         |                                                                                                                                                                                                                                                                                                                                                                                                                                                          |
| Model                                                                                                                                                                                                                                                                                                                                                                                                                                                                                                                                                                                                                                                                                                                                                                                                                                                                                                                                                                                                                                                                                                                                                                                                                                                                                                                                                | Raman (User)                                                                    |                   |            |  |          |                                                                          |  |  |                 |             |  |  |               |         |  |  |  |       |                |  |     |         |            |            |     |         |          |         |                                                                                                                                                                                                                                              |           |            |           |          |                         |          |         |                 |           |      |   |                                                                                                                                                                                                                                                                                                  |         |  |  |  |       |                |  |     |   |            |            |     |   |         |         |                                                                                                                                                                                                                                                                                                                                                                                                                                                          |
| Equation                                                                                                                                                                                                                                                                                                                                                                                                                                                                                                                                                                                                                                                                                                                                                                                                                                                                                                                                                                                                                                                                                                                                                                                                                                                                                                                                             | $1/(C_{Raman} \cdot T^{n_{Raman}})$                                             |                   |            |  |          |                                                                          |  |  |                 |             |  |  |               |         |  |  |  |       |                |  |     |         |            |            |     |         |          |         |                                                                                                                                                                                                                                              |           |            |           |          |                         |          |         |                 |           |      |   |                                                                                                                                                                                                                                                                                                  |         |  |  |  |       |                |  |     |   |            |            |     |   |         |         |                                                                                                                                                                                                                                                                                                                                                                                                                                                          |
| Reduced Chi-Sqr                                                                                                                                                                                                                                                                                                                                                                                                                                                                                                                                                                                                                                                                                                                                                                                                                                                                                                                                                                                                                                                                                                                                                                                                                                                                                                                                      | 4.99235E-8                                                                      |                   |            |  |          |                                                                          |  |  |                 |             |  |  |               |         |  |  |  |       |                |  |     |         |            |            |     |         |          |         |                                                                                                                                                                                                                                              |           |            |           |          |                         |          |         |                 |           |      |   |                                                                                                                                                                                                                                                                                                  |         |  |  |  |       |                |  |     |   |            |            |     |   |         |         |                                                                                                                                                                                                                                                                                                                                                                                                                                                          |
| Adj. R-Square                                                                                                                                                                                                                                                                                                                                                                                                                                                                                                                                                                                                                                                                                                                                                                                                                                                                                                                                                                                                                                                                                                                                                                                                                                                                                                                                        | 0.97596                                                                         |                   |            |  |          |                                                                          |  |  |                 |             |  |  |               |         |  |  |  |       |                |  |     |         |            |            |     |         |          |         |                                                                                                                                                                                                                                              |           |            |           |          |                         |          |         |                 |           |      |   |                                                                                                                                                                                                                                                                                                  |         |  |  |  |       |                |  |     |   |            |            |     |   |         |         |                                                                                                                                                                                                                                                                                                                                                                                                                                                          |
|                                                                                                                                                                                                                                                                                                                                                                                                                                                                                                                                                                                                                                                                                                                                                                                                                                                                                                                                                                                                                                                                                                                                                                                                                                                                                                                                                      | Value                                                                           | Standard Error    |            |  |          |                                                                          |  |  |                 |             |  |  |               |         |  |  |  |       |                |  |     |         |            |            |     |         |          |         |                                                                                                                                                                                                                                              |           |            |           |          |                         |          |         |                 |           |      |   |                                                                                                                                                                                                                                                                                                  |         |  |  |  |       |                |  |     |   |            |            |     |   |         |         |                                                                                                                                                                                                                                                                                                                                                                                                                                                          |
| Tau                                                                                                                                                                                                                                                                                                                                                                                                                                                                                                                                                                                                                                                                                                                                                                                                                                                                                                                                                                                                                                                                                                                                                                                                                                                                                                                                                  | C_Raman                                                                         | 30.50129          | 5.26425    |  |          |                                                                          |  |  |                 |             |  |  |               |         |  |  |  |       |                |  |     |         |            |            |     |         |          |         |                                                                                                                                                                                                                                              |           |            |           |          |                         |          |         |                 |           |      |   |                                                                                                                                                                                                                                                                                                  |         |  |  |  |       |                |  |     |   |            |            |     |   |         |         |                                                                                                                                                                                                                                                                                                                                                                                                                                                          |
| Tau                                                                                                                                                                                                                                                                                                                                                                                                                                                                                                                                                                                                                                                                                                                                                                                                                                                                                                                                                                                                                                                                                                                                                                                                                                                                                                                                                  | n_Raman                                                                         | 2.83153           | 0.20902    |  |          |                                                                          |  |  |                 |             |  |  |               |         |  |  |  |       |                |  |     |         |            |            |     |         |          |         |                                                                                                                                                                                                                                              |           |            |           |          |                         |          |         |                 |           |      |   |                                                                                                                                                                                                                                                                                                  |         |  |  |  |       |                |  |     |   |            |            |     |   |         |         |                                                                                                                                                                                                                                                                                                                                                                                                                                                          |



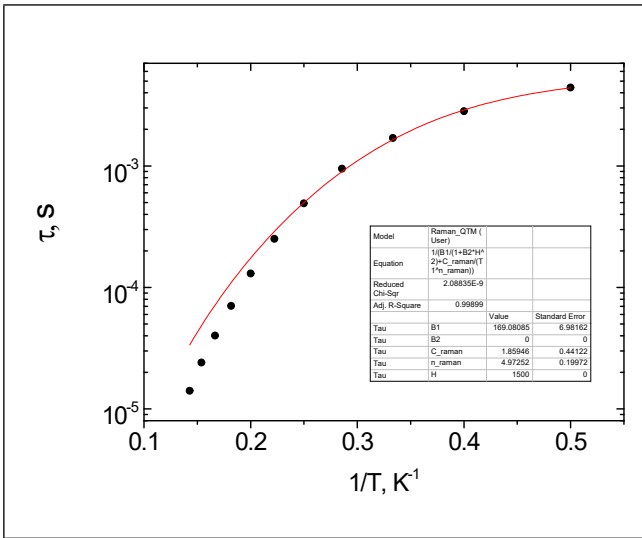

### Raman+ QTM

$$\tau^{-1} = C_{\text{Raman}} T^{n_{\text{Raman}}} + B$$

$$C_{\text{Raman}} = 1.9 \pm 0.4 \text{ s}^{-1} \text{K}^{-n_{\text{Raman}}}$$

$$n_{\text{Raman}} = 5.0 \pm 0.2$$

$$B = 169 \pm 7 \text{ s}^{-1}$$

$$R^2 = 0.99899$$

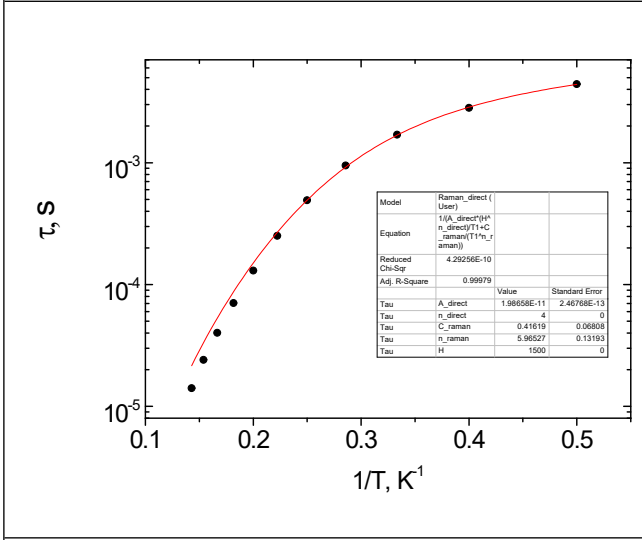

### Raman+Direct

$$\tau^{-1} = C_{\text{Raman}} T^{n_{\text{Raman}}} + A_{\text{direct}} T^4$$

$$C_{\text{Raman}} = 0.42 \pm 0.07 \text{ s}^{-1} \text{K}^{-n_{\text{Raman}}}$$

$$n_{\text{Raman}} = 6.0 \pm 0.1$$

$$A_{\text{direct}} = 1.99 \cdot 10^{-11} \pm 2 \cdot 10^{-13} \text{ K}^{-1} \text{Oe}^{-4} \text{ s}^{-1}$$

$$R^2 = 0.99979$$

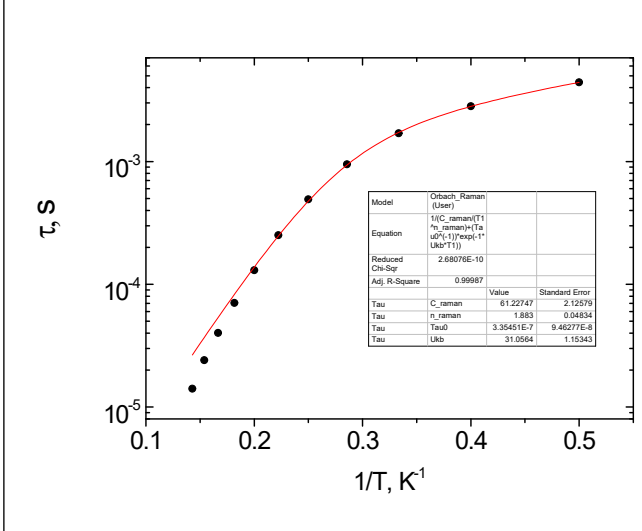

### Orbach+Raman

$$\tau^{-1} = \tau_0^{-1} \cdot \exp(-\Delta E/kT) + C_{\text{Raman}} T^{n_{\text{Raman}}}$$

$$\Delta E/k = 31 \pm 1 \text{ K}$$

$$\tau_0 = 3.4 \cdot 10^{-7} \pm 9 \cdot 10^{-8} \text{ s}$$

$$C_{\text{Raman}} = 61 \pm 2 \text{ s}^{-1} \text{K}^{-n_{\text{Raman}}}$$

$$n_{\text{Raman}} = 1.88 \pm 0.05$$

$$R^2 = 0.99987$$

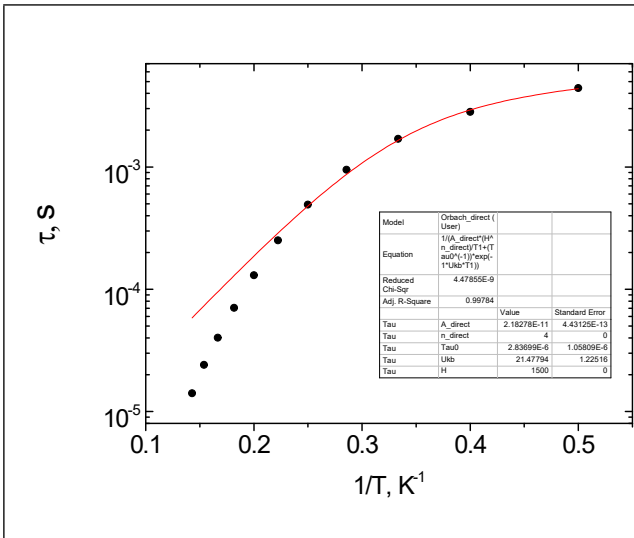

### Orbach+Direct

$$\tau^{-1} = \tau_0^{-1} \cdot \exp(-\Delta E/kT) + A_{direct} TH^4$$

$$\Delta E/k = 21 \pm 1 \text{ K}$$

$$\tau_0 = 3 \cdot 10^{-6} \pm 1 \cdot 10^{-6} \text{ s}$$

$$A_{direct} = 2.18 \cdot 10^{-11} \pm 4 \cdot 10^{-13} \text{ K}^{-1} \text{Oe}^{-4} \text{ s}^{-1}$$

$$R^2 = 0.99784$$

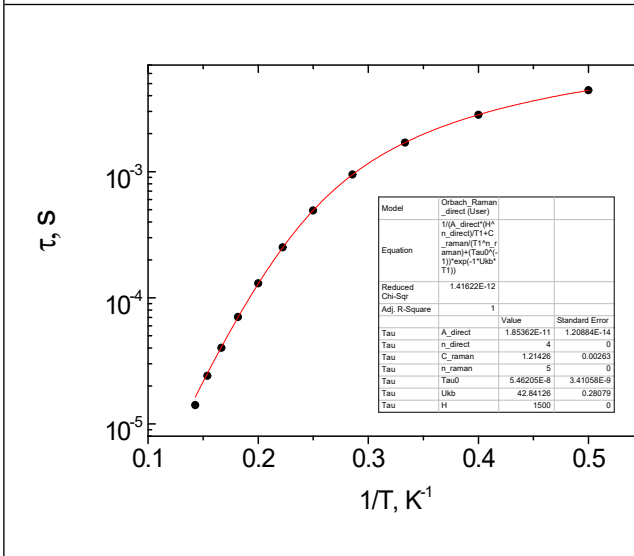

### Orbach+Raman+Direct

$$\tau^{-1} = \tau_0^{-1} \cdot \exp(-\Delta E/kT) + C_{Raman} T^{n_{Raman}} + A_{direct} TH^4$$

$$\Delta E/k = 42.8 \pm 0.3 \text{ K}$$

$$\tau_0 = 5.5 \cdot 10^{-8} \pm 3 \cdot 10^{-9} \text{ s}$$

$$C_{Raman} = 1.214 \pm 0.003 \text{ s}^{-1} \text{K}^{-n_{Raman}}$$

$$n_{Raman} = 5 \text{ (fixed)}$$

$$A_{direct} = 1.854 \cdot 10^{-11} \pm 1 \cdot 10^{-14} \text{ K}^{-1} \text{Oe}^{-4} \text{ s}^{-1}$$

$$R^2 = 1$$

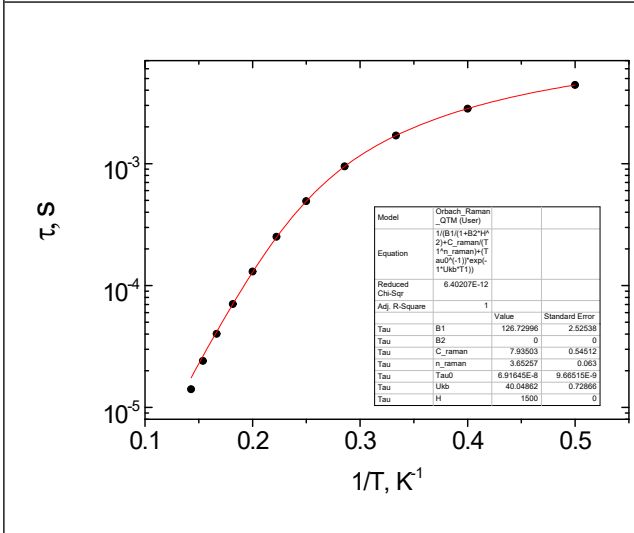

### Orbach+Raman+QTM

$$\tau^{-1} = \tau_0^{-1} \cdot \exp(-\Delta E/kT) + C_{Raman} T^{n_{Raman}} + B$$

$$\Delta E/k = 40.0 \pm 0.7 \text{ K}$$

$$\tau_0 = 7 \cdot 10^{-8} \pm 1 \cdot 10^{-8} \text{ s}$$

$$C_{Raman} = 7.9 \pm 0.5 \text{ s}^{-1} \text{K}^{-n_{Raman}}$$

$$n_{Raman} = 3.65 \pm 0.06$$

$$B = 127 \pm 3 \text{ s}^{-1}$$

$$R^2 = 1$$

**Table S5.** Fitting of the  $\tau$  vs.  $T$  dependences for **2** ( $H = 1.5$  kOe,  $T = 2.5$ - $8.5$  K).

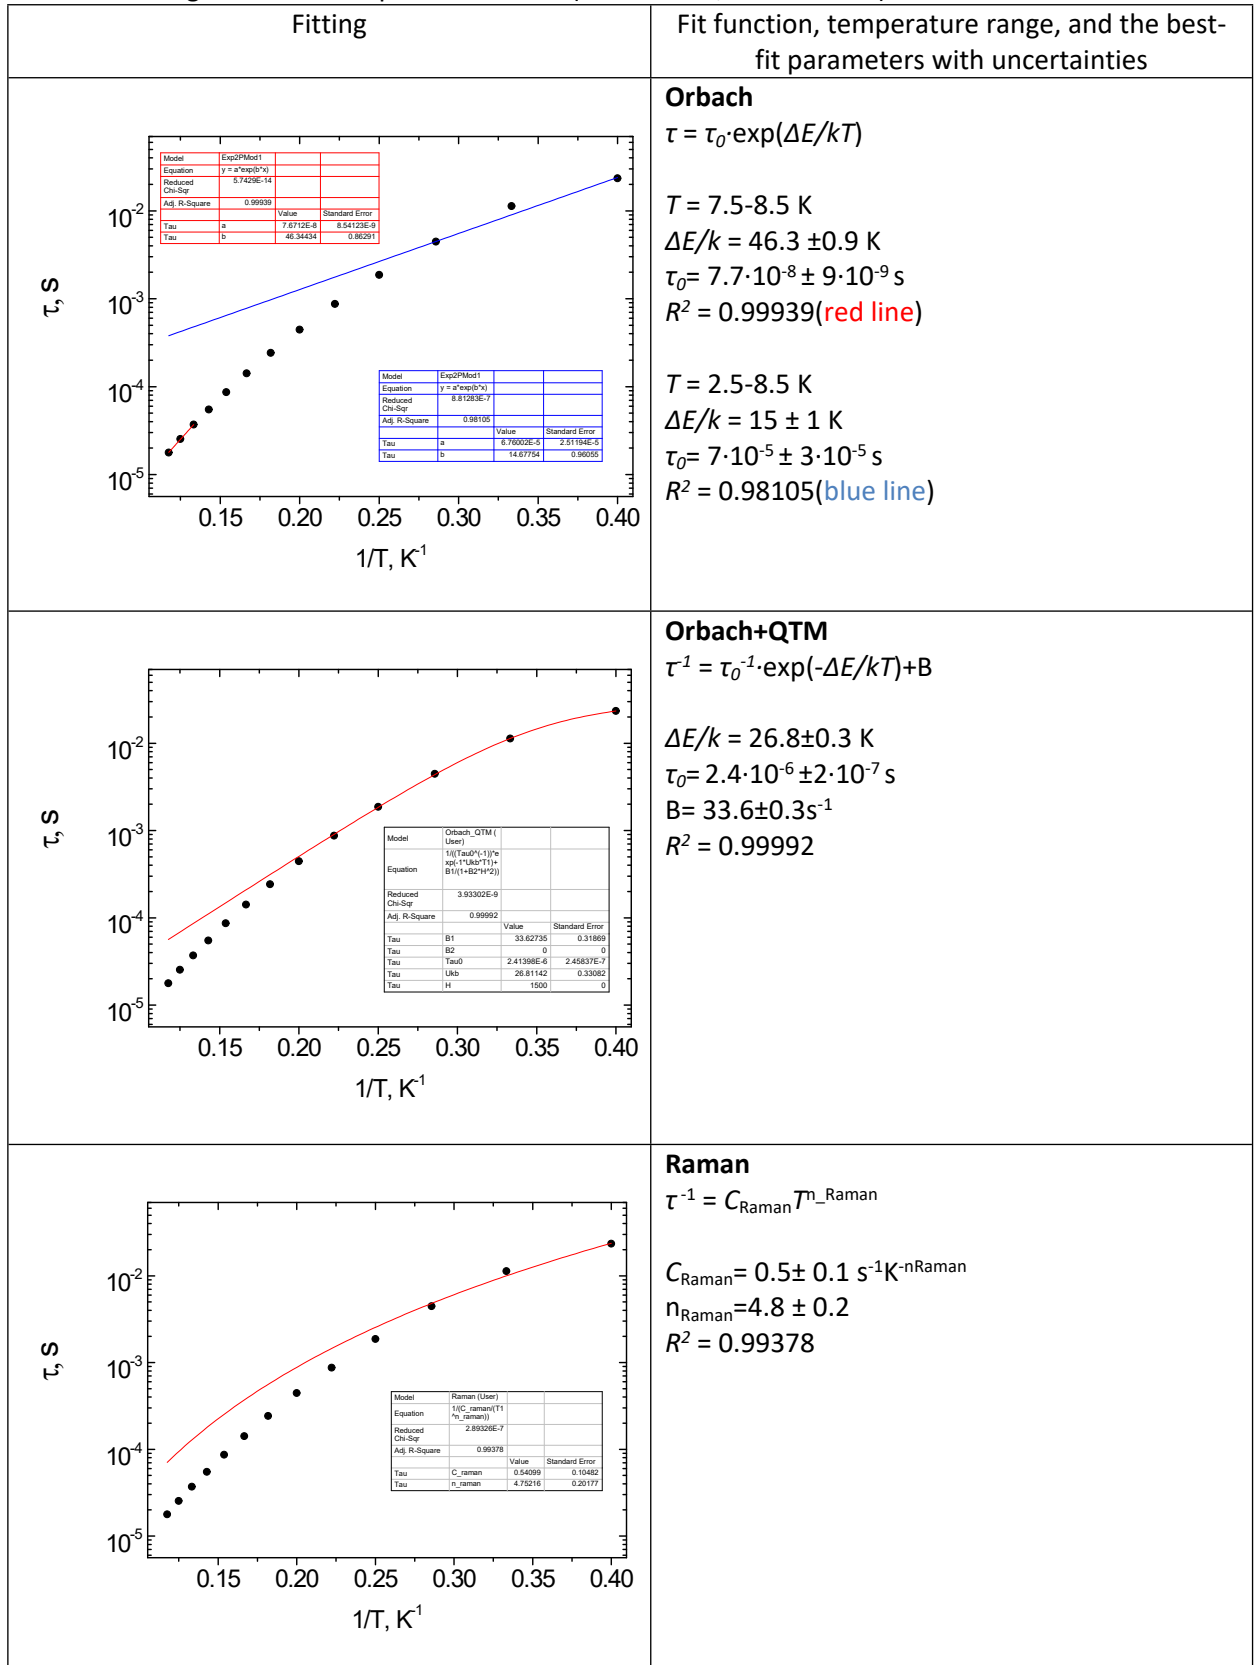

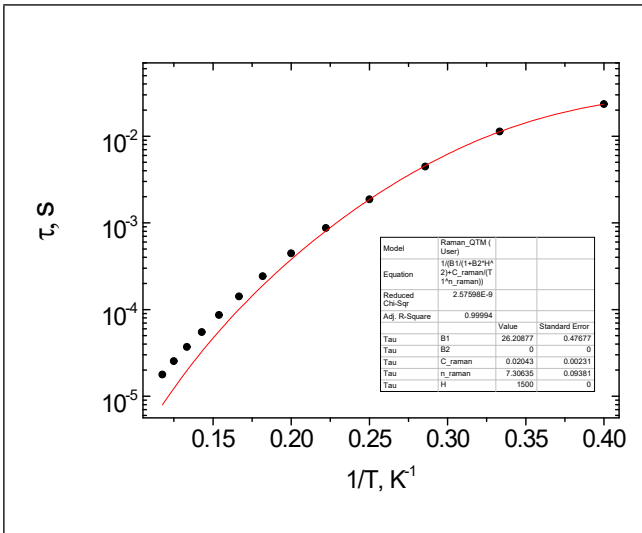

### Raman+ QTM

$$\tau^{-1} = C_{\text{Raman}} T^{n_{\text{Raman}}} + B$$

$$C_{\text{Raman}} = 0.020 \pm 0.002 \text{ s}^{-1} \text{K}^{-n_{\text{Raman}}}$$

$$n_{\text{Raman}} = 7.31 \pm 0.09$$

$$B = 26.2 \pm 0.5 \text{ s}^{-1}$$

$$R^2 = 0.99994$$

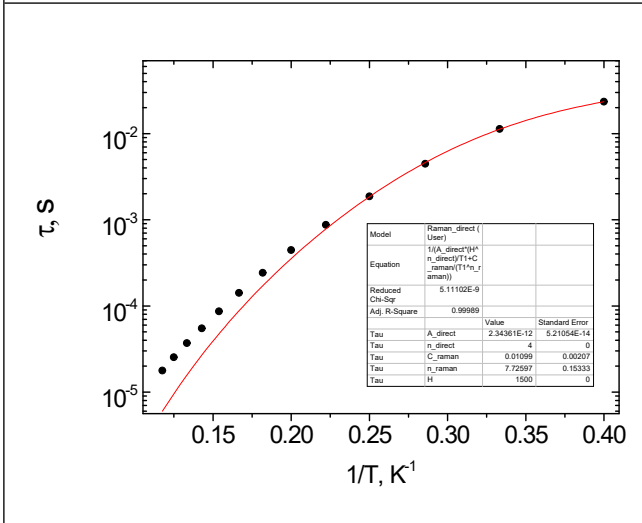

### Raman+Direct

$$\tau^{-1} = C_{\text{Raman}} T^{n_{\text{Raman}}} + A_{\text{direct}} T^4$$

$$C_{\text{Raman}} = 0.011 \pm 0.002 \text{ s}^{-1} \text{K}^{-n_{\text{Raman}}}$$

$$n_{\text{Raman}} = 7.7 \pm 0.2$$

$$A_{\text{direct}} = 2.34 \cdot 10^{-12} \pm 5 \cdot 10^{-14} \text{ K}^{-1} \text{Oe}^{-4} \text{ s}^{-1}$$

$$R^2 = 0.99989$$

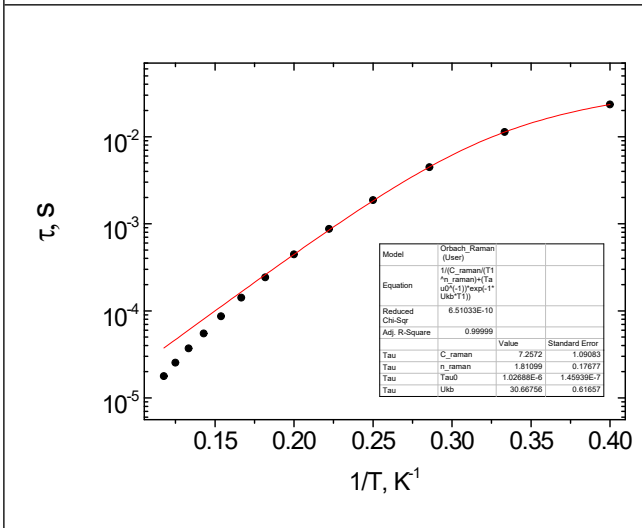

### Orbach+Raman

$$\tau^{-1} = \tau_0^{-1} \cdot \exp(-\Delta E/kT) + C_{\text{Raman}} T^{n_{\text{Raman}}}$$

$$\Delta E/k = 30.7 \pm 0.6 \text{ K}$$

$$\tau_0 = 1.0 \cdot 10^{-6} \pm 1 \cdot 10^{-7} \text{ s}$$

$$C_{\text{Raman}} = 7 \pm 1 \text{ s}^{-1} \text{K}^{-n_{\text{Raman}}}$$

$$n_{\text{Raman}} = 1.8 \pm 0.2$$

$$R^2 = 0.99999$$

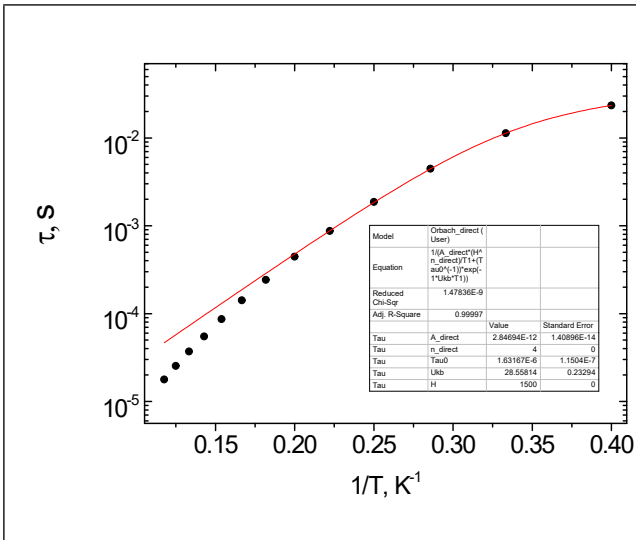

### Orbach+Direct

$$\tau^{-1} = \tau_0^{-1} \cdot \exp(-\Delta E/kT) + A_{direct} TH^4$$

$$\Delta E/k = 28.5 \pm 0.2 \text{ K}$$

$$\tau_0 = 1.6 \cdot 10^{-6} \pm 1 \cdot 10^{-7} \text{ s}$$

$$A_{direct} = 2.85 \cdot 10^{-12} \pm 1 \cdot 10^{-14} \text{ K}^{-1} \text{Oe}^{-4} \text{ s}^{-1}$$

$$R^2 = 0.99997$$

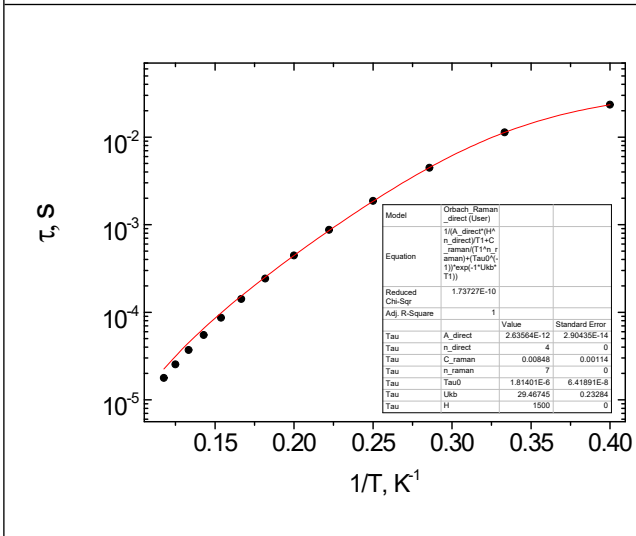

### Orbach+Raman+Direct

$$\tau^{-1} = \tau_0^{-1} \cdot \exp(-\Delta E/kT) + C_{Raman} T^{n_{Raman}} + A_{direct} TH^4$$

$$\Delta E/k = 29.5 \pm 0.2 \text{ K}$$

$$\tau_0 = 1.81 \cdot 10^{-6} \pm 6 \cdot 10^{-8} \text{ s}$$

$$C_{Raman} = 0.008 \pm 0.001 \text{ s}^{-1} \text{K}^{-n_{Raman}}$$

$$n_{Raman} = 7 \text{ (fixed)}$$

$$A_{direct} = 2.64 \cdot 10^{-12} \pm 3 \cdot 10^{-14} \text{ K}^{-1} \text{Oe}^{-4} \text{ s}^{-1}$$

$$R^2 = 1$$

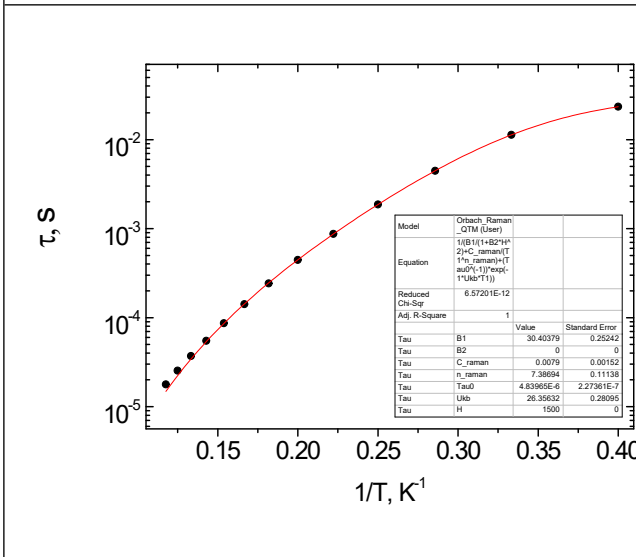

### Orbach+Raman+QTM

$$\tau^{-1} = \tau_0^{-1} \cdot \exp(-\Delta E/kT) + C_{Raman} T^{n_{Raman}} + B$$

$$\Delta E/k = 26.4 \pm 0.3 \text{ K}$$

$$\tau_0 = 4.8 \cdot 10^{-6} \pm 2 \cdot 10^{-7} \text{ s}$$

$$C_{Raman} = 0.008 \pm 0.002 \text{ s}^{-1} \text{K}^{-n_{Raman}}$$

$$n_{Raman} = 7.4 \pm 0.1$$

$$B = 30.4 \pm 0.3 \text{ s}^{-1}$$

$$R^2 = 1$$

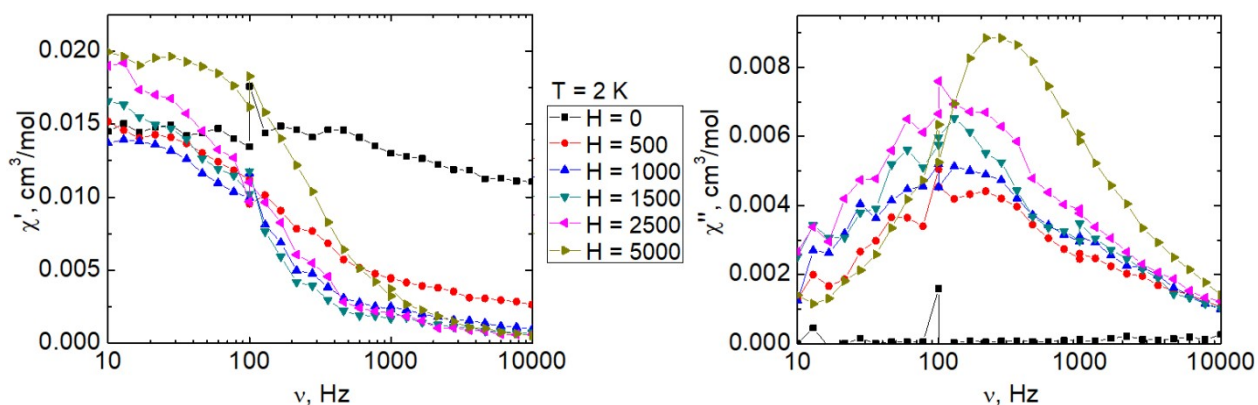

**Fig. S22.** Frequency dependencies of the in-phase ( $\chi'$ ) and out-of phase ( $\chi''$ ) components of the dynamic magnetic susceptibility of **1\_Lu** at varied strength of the external static magnetic field and  $T = 2$  K. Solid lines are visual guides.

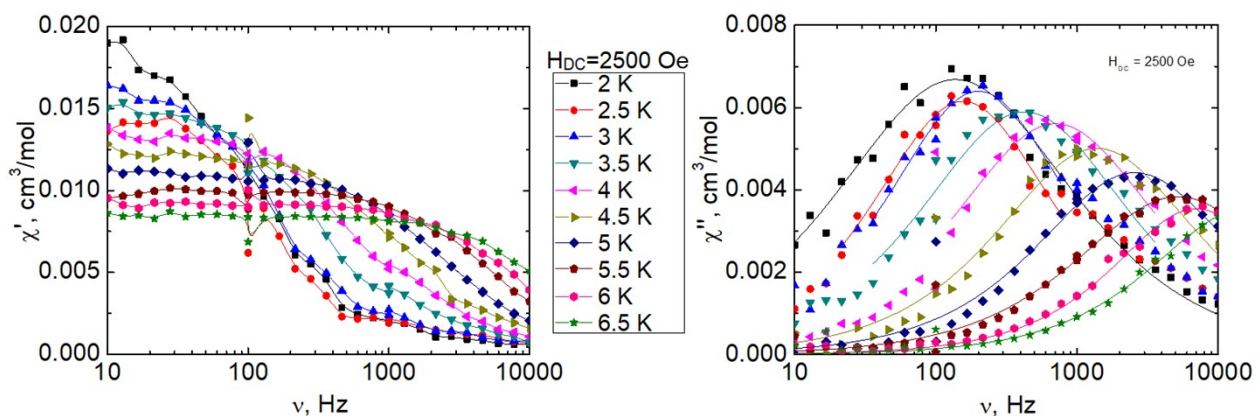

**Fig. S23.** Frequency dependencies of the in-phase ( $\chi'$ , a) and out-of-phase ( $\chi''$ , b) components of the dynamic magnetic susceptibility of **1\_Lu** under optimal magnetic field 2500 Oe at various temperatures. Solid lines are visual guides (a), approximations by the generalized Debye model (b).

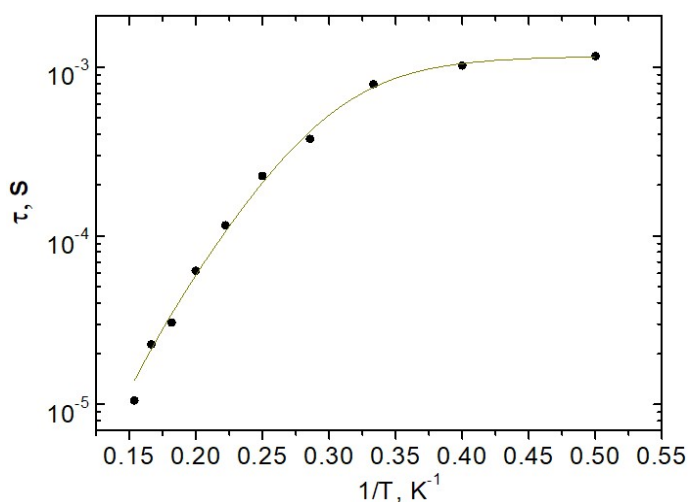

**Fig. S24.**  $\tau$  vs.  $T^{-1}$  plots for **1\_Lu** in 2500 Oe DC field. Solid line represents best fit by the sum of Orbach, Raman and QTM relaxation mechanisms.

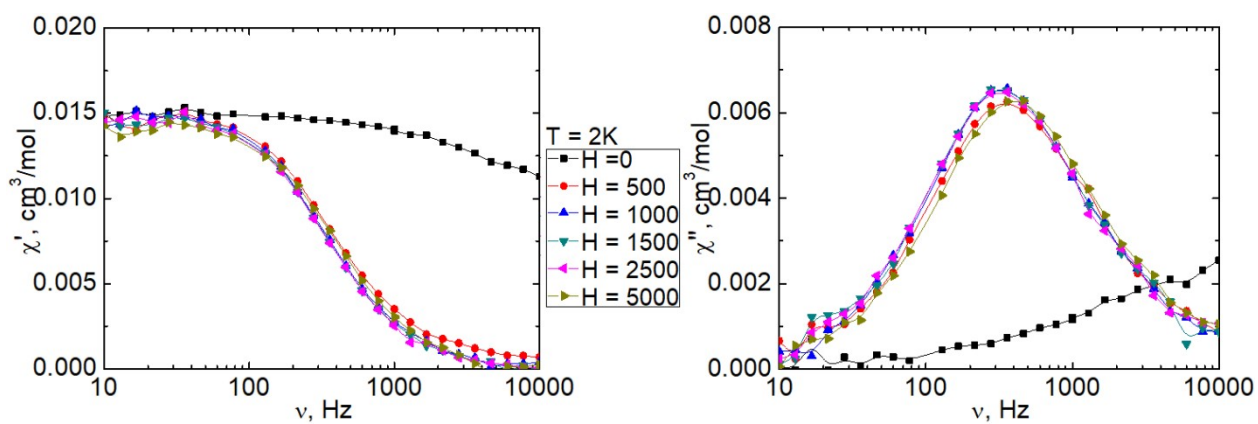

**Fig. S25.** Frequency dependencies of the in-phase ( $\chi'$ ) and out-of-phase ( $\chi''$ ) components of the dynamic magnetic susceptibility of **2\_Y** at varied strength of the external static magnetic field and  $T=2\text{K}$ . Solid lines are visual guides.

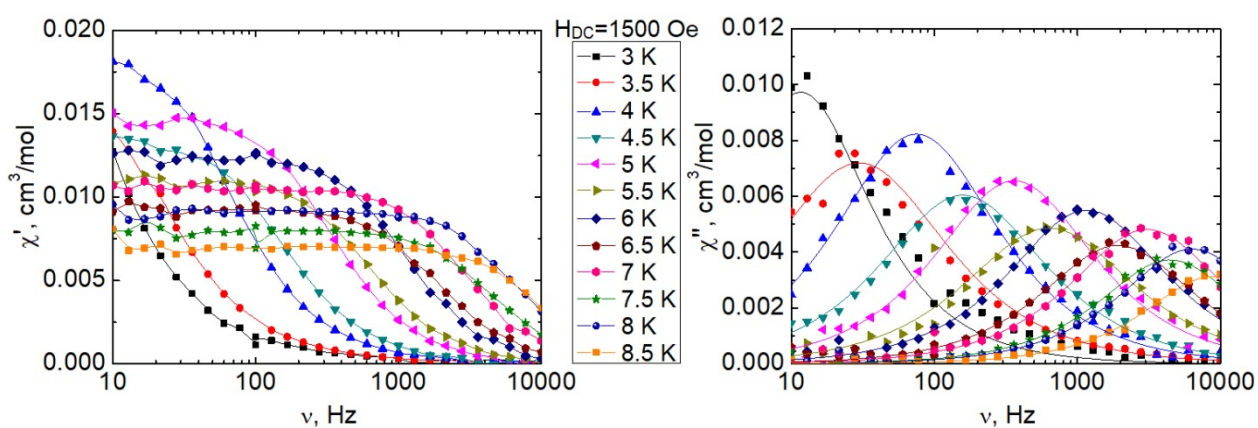

**Fig. S26.** Frequency dependencies of the in-phase ( $\chi'$ , a) and out-of phase ( $\chi''$ , b) components of the dynamic magnetic susceptibility of **2\_Y** under optimal magnetic field 1500 Oe at various temperatures. Solid lines are visual guides (a), approximations obtained by the use of generalized Debye model (b).

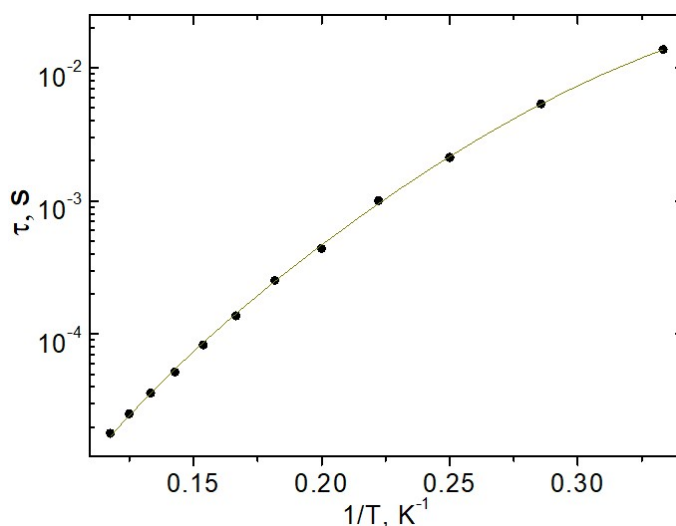

**Fig. S27.**  $\tau_s$  vs.  $T^{-1}$  plots for **2\_Y** in 1500 Oe DC field. Solid line represents best fit by the sum of Orbach, Raman and QTM relaxation mechanisms.

**Table S6.** Fitting parameters of magnetization relaxation for **3** and **4**.

| Complex<br>( <i>dc</i> -field, Oe) | Orbach+Raman+QTM              |                                         |                                                               |                    |                       |
|------------------------------------|-------------------------------|-----------------------------------------|---------------------------------------------------------------|--------------------|-----------------------|
|                                    | $\Delta_{\text{eff}}/k_B$ , K | $\tau_0$ , S                            | $C_{\text{Raman}}, \text{s}^{-1}\text{K}^{-n_{\text{Raman}}}$ | $n_{\text{Raman}}$ | $B$ , $\text{s}^{-1}$ |
| <b>1_Lu</b><br>(2500)              | $27 \pm 3$                    | $4.4 \cdot 10^{-7} \pm 4 \cdot 10^{-7}$ | $0.1 \pm 0.1$                                                 | 7 (fixed)          | $860 \pm 28$          |
| <b>2_Y</b><br>(1500)               | $35 \pm 3$                    | $1 \cdot 10^{-6} \pm 5 \cdot 10^{-7}$   | $0.040 \pm 0.008$                                             | 6.5<br>(fixed)     | $18 \pm 5$            |



**Table S7.** Known 7-coordinated Yb SMMs.

| Complex /<br>Nuclearity                                                                                                                                             | Polyhedron                                                    | $\Delta_{\text{eff}}/k_B, \text{ K} /$<br>( $H_{\text{dc}}$ ) | [Ref.]    |
|---------------------------------------------------------------------------------------------------------------------------------------------------------------------|---------------------------------------------------------------|---------------------------------------------------------------|-----------|
| $[\text{Yb}(\text{acac}^{[2]})_2(\text{Q}^{[3]})]_n$ (1)                                                                                                            | Capped octahedron                                             | 40 /<br>(1.5 kOe)                                             | This work |
| $\text{YbL}^{\text{[I]}} \cdot 4\text{H}_2\text{O} /$<br>Mononuclear                                                                                                |                                                               | 16                                                            | 2         |
| $\text{Yb}(\text{trensal}^{\text{[III]}})^{\ddagger} /$<br>Mononuclear                                                                                              |                                                               | 54.7 <sup>†</sup>                                             | 5         |
| $[\text{Yb}_2(\text{H}_2\text{cht}^{\text{[III]}})_2\text{Cl}_4(\text{H}_2\text{O})(\text{MeCN})] \cdot \text{MeCN} /$<br>Dinuclear                                 |                                                               | 19.5(2)                                                       | 8         |
| $\text{YbL}^{\text{[VI]}} /$<br>Mononuclear                                                                                                                         |                                                               | .5                                                            | 9         |
| $\text{YbL}^{\text{[VI]}} \cdot 3\text{MeOH} /$<br>Mononuclear                                                                                                      |                                                               |                                                               |           |
| $\{\text{Yb}_2(\text{DTE}^{\text{[VI]}})(\text{H-DTE})(\text{MeOH})_2 \cdot 2\text{H}_2\text{O}\}_n^{\ddagger} /$<br>1D-polynuclear                                 | Capped trigonal prism                                         | 38.9 <sup>†</sup>                                             | 1         |
| $[\text{Yb}(\text{H}_3\text{L}^{1,1,4\text{[VII]}})] \cdot 2\text{MeOH} /$<br>Mononuclear                                                                           |                                                               | 20.9 <sup>†</sup>                                             | 6         |
| $[\text{Yb}\{\text{Ir}(\text{ppy}^{\text{[VIII]}})_2(\text{dcbpy}^{\text{[IX]}})_2(\text{NO}_3)(\text{H}_2\text{O})_4\} \cdot \text{Solv}^{\#} /$<br>1D-polynuclear | Capped trigonal prism $\leftrightarrow$ Pentagonal bipyramide | 24.4                                                          | 4         |
| $[\text{Yb}_2(\text{OH})\{\text{Ir}(\text{ppy})_2(\text{dcbpy})_4(\text{NO}_3)(\text{H}_2\text{O})_4\} \cdot \text{Solv}^{\#} /$<br>2D-polynuclear                  |                                                               | 22.2                                                          |           |
| $\text{Yb}_2\text{L}^{\text{[XI]}}_2(\text{depma}^{\text{[XI]}})_2\text{Cl}_2 /$<br>Dinuclear                                                                       | Pentagonal bipyramide                                         | 23.5                                                          | 3         |
| $[\text{Yb}_2(\text{NMP}^{\text{[XIII]}})_{12}(\text{PW}_{12}\text{O}_{40})][\text{PW}_{12}\text{O}_{40}]^{\#\#} /$<br>Dinuclear                                    |                                                               | 11.84 <sup>A</sup>                                            | 7         |
| $[\text{Yb}(\text{BcrCOO}^{\text{[XIII]}})(\text{acac}^{\text{[XIV]}})_2(\text{H}_2\text{O})_n]^{\#} /$<br>1D-polynuclear                                           |                                                               | 36                                                            | 10        |
| $[\text{Yb}(\text{H}_3\text{Bmshp}^{\text{[XVI]}})(\text{DMF})_2\text{Cl}_2] \cdot \text{DMF} \cdot 1.5\text{H}_2\text{O} /$<br>Mononuclear                         |                                                               | 14.5 <sup>†</sup>                                             | 11        |
| $[\text{Yb}(\text{H}_3\text{Bmshp})(\text{DMF})_2\text{Cl}_2] \cdot \text{H}_4\text{Bmshp} /$<br>Mononuclear                                                        |                                                               | 38.3 <sup>†</sup>                                             |           |

<sup>[I]</sup>L = fully (triply) deprotonated N[(CH<sub>2</sub>)<sub>2</sub>N=CH-R-CH=N-(CH<sub>2</sub>)<sub>2</sub>]<sub>3</sub>N cryptand (R = m-C<sub>6</sub>H<sub>2</sub>OH-2-Me-5); <sup>[III]</sup>trensal = fully (triply) deprotonated 2,2',2''-tris(salicylideneimino)triethylamine; <sup>†</sup>No powder XRD data were provided for the studied samples; <sup>†</sup>Recalculated from cm<sup>-1</sup>; <sup>[III]</sup>H<sub>3</sub>cht = mono deprotonated 1,3,5-cyclohexanetriol; <sup>[VI]</sup>L = tris((3-formyl-5-methylsalicylidene)amino)ethylamine; <sup>§</sup> $\Delta_{\text{eff}}/k_B$  values were not determined since Orbach mechanism was not applied to fit relaxation times; <sup>[VI]</sup>L\* = triply deprotonated product of condensation of tris((3-formyl-5-methylsalicylidene)amino)ethylamine with benzylamine; <sup>[VI]</sup>DTE = 1,2-bis(5-carboxyl-2-methyl-3-thienyl)perfluorocyclopentene); <sup>[VII]</sup>H<sub>3</sub>L<sup>1,1,4</sup>= triply deprotonated 2-[[{2-[(2-hydroxybenzyl)amino]ethyl}{2-[3-(2-hydroxybenzyl)-2,2-dimethylimidazolidin-1-yl]ethyl]amino)methyl]phenol; <sup>[VIII]</sup>ppy = 2-phenylpyridine; <sup>[IX]</sup>dcbpy = 2,2'-bipyridine-4-carboxyl-4'-carboxylate; <sup>#</sup>Magnetic behavior of these complexes is governed by Yb<sup>3+</sup> due to diamagnetism of the involved cations of heterometals; <sup>[XI]</sup>L = doubly deprotonated N<sup>1</sup>,N<sup>3</sup>-bis(salicylideneimino)diethylenetriamine; <sup>[XI]</sup>depma<sub>2</sub> = dimerized 9-diethyl-phosphonomethylantracene; <sup>[XIII]</sup>NMP = N-methyl pyrrolidone; <sup>A</sup>This value was obtained for the Lu-diluted sample; <sup>[XIII]</sup>BrcCOO = ( $\eta_6$ -benzoate)tricarbonylchromium; <sup>[XIV]</sup>acac = acetylacetonate (pentane-2,4-dionate) anion; <sup>[XVI]</sup>H<sub>3</sub>Bmshp = mono deprotonated (2,6-bis[(3-methoxysalicylidene)hydrazinecarbonyl]-pyridine).

## References

- 1 M.A. Yattoo, G. Cosquer, M. Morimoto, M. Irie, B.K. Breedlove and M. Yamashita, *Magnetochemistry*, 2016, **2**, 21;
- 2 C.D. Buch, D. Mitcov and S. Piligkos, *Dalton Trans.*, 2020, **49**, 13557;

- 3 Q. Zou, J.-C. Liu, X.-D. Huang, S.-S. Bao and L.-M. Zheng, *Chin. Chem. Lett.*, 2021, **32**, 1519;
- 4 K. Fan, S.-S. Bao, R. Huo, X.-D. Huang, Y.-J. Liu, Z.-W. Yu, M. Kurmoo and L.-M. Zheng, *Inorg. Chem. Front.*, 2020, **7**, 4580;
- 5 K.S. Pedersen, J. Dreiser, H. Weihe, R. Sibille, H.V. Johannesen, M.A. Sørensen, B.E. Nielsen, M. Sigrist, H. Mutka, S. Rols, J. Bendix and S. Piligkos, *Inorg. Chem.*, 2015, **54**, 7600;
- 6 M. Fondo, J. Corredoira-Vázquez, A.M. García-Deibe, J. Sanmartín-Matalobos, M. Amoza, A.M.P. Botas, R.A.S. Ferreira, L.D. Carlos and E. Colacio, *Inorg. Chem. Front.*, 2020, **7**, 3019;
- 7 J. Li, C. Yuan, L. Yang, M. Kong, J. Zhang, J.-Y. Ge, Y.-Q. Zhang and Y. Song, *Inorg. Chem.*, 2017, **56**, 7835;
- 8 J.-D. Leng, J.-L. Liu, Y.-Z. Zheng, L. Ungur, L.F. Chibotaru, F.-S. Guo and M.-L. Tong, *Chem. Commun.*, 2013, **49**, 158;
- 9 C.D. Buch, S.H. Hansen, C.M. Tram, D. Mitcov and S. Piligkos, *Inorg. Chem.*, 2020, **59**, 16328;
- 10 A.V. Gavrikov, P.S. Koroteev, N.N. Efimov, Z.V. Dobrokhotova, A.B. Ilyukhin, A.K. Kostopoulos, A.-M. Ariciu and V.N. Novotortsev, *Dalton Trans.*, 2017, **46**, 3369;
- 11 D.-Q. Wu, D. Shao, X.-Q. Wei, F.-X. Shen, L. Shi, Y.-Q. Zhang and X.-Y. Wang, *Dalton Trans.*, 2017, **46**, 12884.

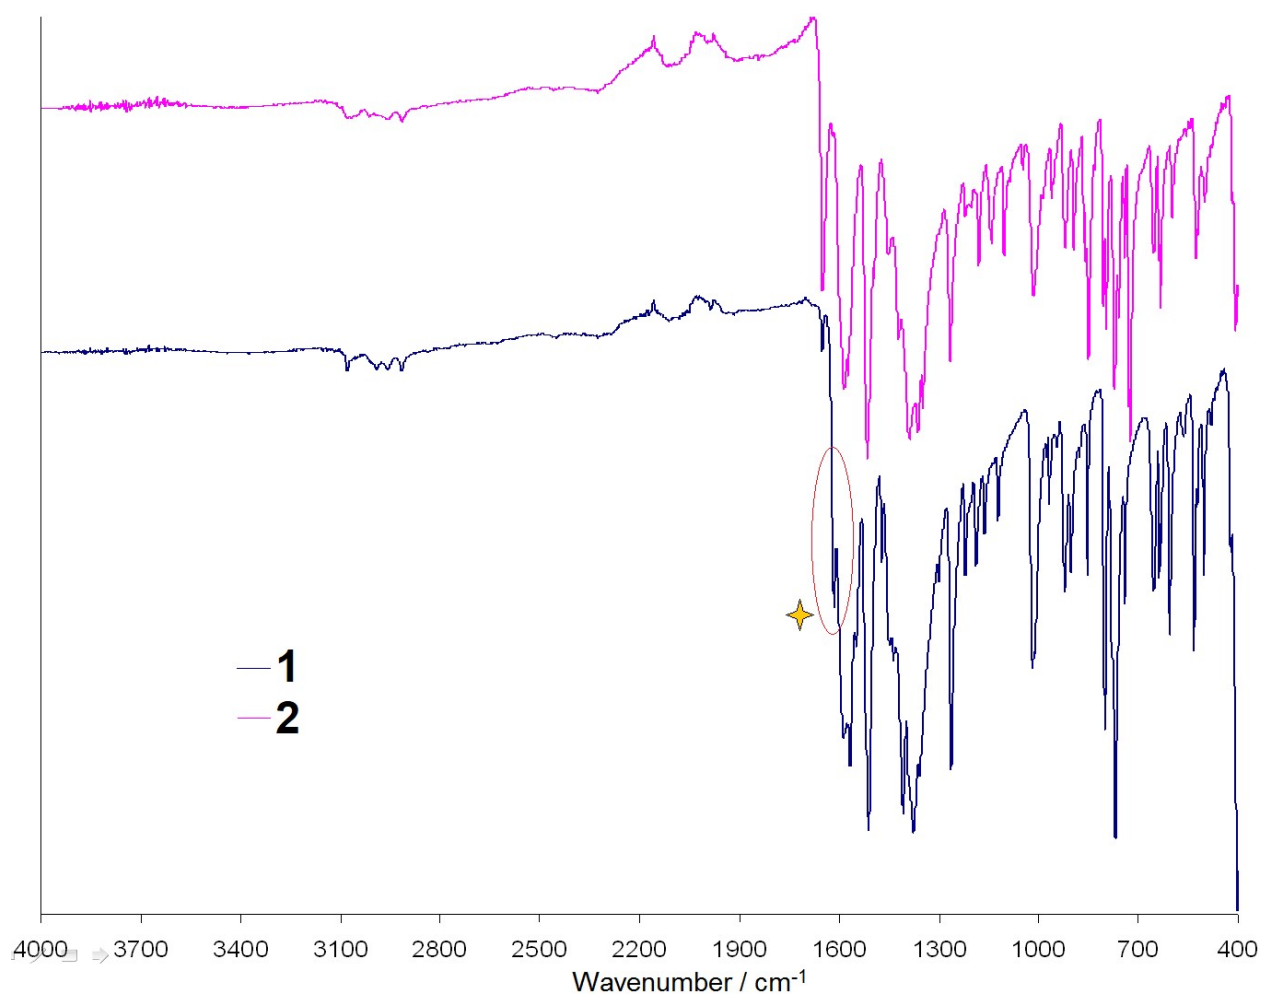

**Fig. S28.** IR spectra of **1** and **2** with specified band of high-energy asymmetric stretching vibration of COO(Q) groups.

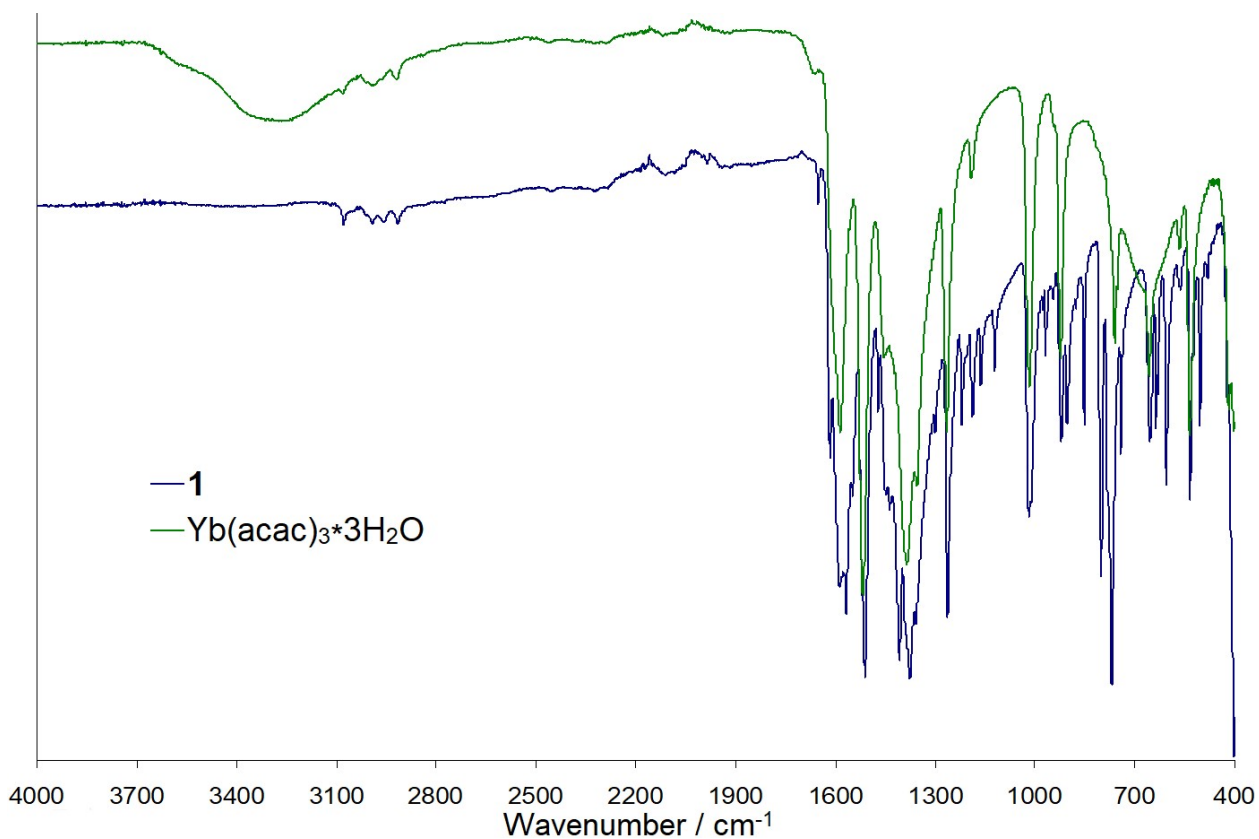

**Fig. S29.** IR spectrum of **1** compared to that of initial Yb(acac)<sub>3</sub>·3H<sub>2</sub>O.

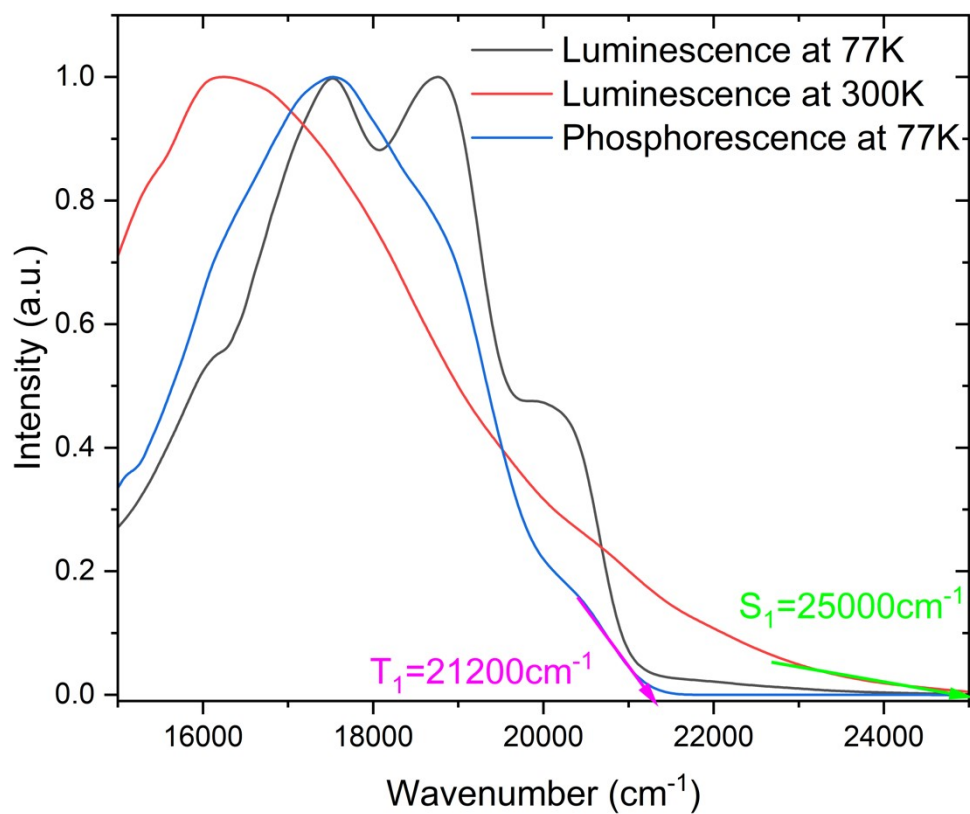

**Fig. S30.** Luminescence spectra in the energy representation for the **2\_Gd** at temperatures of 77K and 300K.

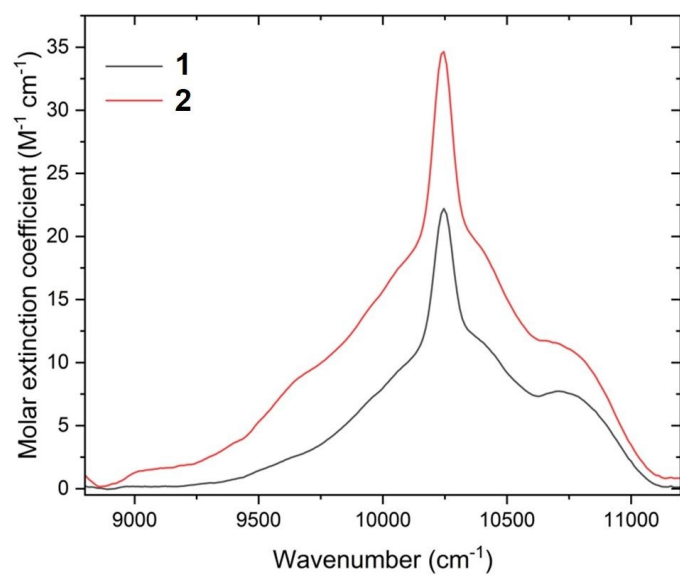

**Fig. S31.** Optical absorption spectra of solutions of **1** and **2** in DMSO.
